# Supplementary material for: Patient-reported experiences with general practitioners: a randomised study of mail and web-based approaches following a national survey
Source: PubMed Central journal article supplement — BMJ Open. 2020 Oct 13;10(10):e036533. doi: 10.1136/bmjopen-2019-036533 (PMC7554501; doi:10.1136/bmjopen-2019-036533), 2020-10-13
Supplement: bmjopen-2019-036533.draft_revisions.pdf [file bmjopen-2019-036533.draft_revisions.pdf]

# BMJ Open

BMJ Open is committed to open peer review. As part of this commitment we make the peer review history of every article we publish publicly available.

When an article is published we post the peer reviewers' comments and the authors' responses online. We also post the versions of the paper that were used during peer review. These are the versions that the peer review comments apply to.

The versions of the paper that follow are the versions that were submitted during the peer review process. They are not the versions of record or the final published versions. They should not be cited or distributed as the published version of this manuscript.

BMJ Open is an open access journal and the full, final, typeset and author-corrected version of record of the manuscript is available on our site with no access controls, subscription charges or pay-per-view fees (<http://bmjopen.bmj.com>).

If you have any questions on BMJ Open's open peer review process please email [info.bmjopen@bmj.com](mailto:info.bmjopen@bmj.com)

# BMJ Open

## **Patient-reported experiences with general practitioners: a randomized study of mail and web-based approaches following a national survey**

|                               |                                                                                                                                                                                                                                                               |
|-------------------------------|---------------------------------------------------------------------------------------------------------------------------------------------------------------------------------------------------------------------------------------------------------------|
| Journal:                      | <i>BMJ Open</i>                                                                                                                                                                                                                                               |
| Manuscript ID                 | bmjopen-2019-036533                                                                                                                                                                                                                                           |
| Article Type:                 | Original research                                                                                                                                                                                                                                             |
| Date Submitted by the Author: | 19-Dec-2019                                                                                                                                                                                                                                                   |
| Complete List of Authors:     | Iversen, Hilde; Norwegian Institute of Public Health, Division of Health Services<br>Holmboe, Olaf; Norwegian Institute of Public Health, Division of Health Services<br>Bjertnaes, Oyvind; Norwegian Institute of Public Health, Division of Health Services |
| Keywords:                     | PRIMARY CARE, STATISTICS & RESEARCH METHODS, Quality in health care < HEALTH SERVICES ADMINISTRATION & MANAGEMENT                                                                                                                                             |
|                               |                                                                                                                                                                                                                                                               |

SCHOLARONE™  
Manuscripts

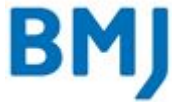

I, the Submitting Author has the right to grant and does grant on behalf of all authors of the Work (as defined in the below author licence), an exclusive licence and/or a non-exclusive licence for contributions from authors who are: i) UK Crown employees; ii) where BMJ has agreed a CC-BY licence shall apply, and/or iii) in accordance with the terms applicable for US Federal Government officers or employees acting as part of their official duties; on a worldwide, perpetual, irrevocable, royalty-free basis to BMJ Publishing Group Ltd ("BMJ") its licensees and where the relevant Journal is co-owned by BMJ to the co-owners of the Journal, to publish the Work in this journal and any other BMJ products and to exploit all rights, as set out in our [licence](#).

The Submitting Author accepts and understands that any supply made under these terms is made by BMJ to the Submitting Author unless you are acting as an employee on behalf of your employer or a postgraduate student of an affiliated institution which is paying any applicable article publishing charge ("APC") for Open Access articles. Where the Submitting Author wishes to make the Work available on an Open Access basis (and intends to pay the relevant APC), the terms of reuse of such Open Access shall be governed by a Creative Commons licence – details of these licences and which [Creative Commons](#) licence will apply to this Work are set out in our licence referred to above.

Other than as permitted in any relevant BMJ Author's Self Archiving Policies, I confirm this Work has not been accepted for publication elsewhere, is not being considered for publication elsewhere and does not duplicate material already published. I confirm all authors consent to publication of this Work and authorise the granting of this licence.

1  
2  
3  
4 **Patient-reported experiences with general practitioners: a**  
5 **randomized study of mail and web-based approaches**  
6 **following a national survey**  
7  
8  
9  
10  
11  
12  
13

14 **Authors:**

15  
16 Hilde Hestad Iversen<sup>1</sup> ([hilde.hestad.iversen@fhi.no](mailto:hilde.hestad.iversen@fhi.no)) +47 46400425) (Corresponding author)

17  
18 Olaf Holmboe<sup>1</sup> ([olaf.holmboe@fhi.no](mailto:olaf.holmboe@fhi.no))

19  
20 Oyvind Bjertnaes<sup>1</sup> ([oyvindandresen.bjertnaes@fhi.no](mailto:oyvindandresen.bjertnaes@fhi.no))  
21  
22  
23  
24  
25  
26  
27

28 **Affiliations:**

29  
30 <sup>1</sup>Division of Health Services, Norwegian Institute of Public Health, PO Box 4404 Nydalen,  
31  
32 0403 Oslo, Norway  
33  
34  
35  
36  
37  
38  
39  
40  
41  
42  
43  
44  
45  
46  
47

48 **Keywords:** data collection, general practitioners, patient satisfaction, physicians, random  
49  
50 allocation, surveys and questionnaires  
51  
52  
53

54 **Word count:** 2,340  
55  
56  
57  
58  
59  
60

## Abstract

### Objective

The aim of this study was to compare response rates, background characteristics, data quality and main study results for a survey of patient experiences with general practitioners (GPs) administered by mail and web-based approaches.

### Design

Cross-sectional survey.

### Setting

GPs in Norway.

### Participants

Patients of family physicians in Norway.

### Intervention

Based on a three-stage sampling design, 6999 patients of GPs aged 16 or older were randomized to one of two survey administration protocols: Group A, who were mailed an invitation with both a pen-and-paper and electronic response option ( $n=4,999$ ) and Group B, who received an email invitation with electronic response option ( $n=2,000$ ).

### Main outcome measures

Response rates, background characteristics, data quality and main study results.

### Results

The response rate was markedly higher for the mail survey (42.6%) than for the web-based survey (18.3%). A few of the background variables differed significantly between the two groups, but the data quality and patient-reported experiences were similar.

## Conclusions

The response rate was 2.3-fold higher for the mail survey than for the web-based survey, but the two protocols yielded similar results for patient-reported experiences.

For peer review only

## Article Summary

### Strengths and Limitations

- The establishment of a national register with electronic contact information opens up new possibilities regarding electronic and web-based surveys
- A purely electronic protocol has not previously been explored in the national program for monitoring and reporting on health-care quality using patient experience surveys in Norway
- The results should be applicable to health systems with similar infrastructures and digital maturities, and also to countries working to establish regional or national digital infrastructures
- Future research needs to focus on initiatives for increasing response rates in web-based protocols, including sending multiple reminders using a combination of emails, messages on mobile phones, and other available platforms
- This study included adults evaluating their GPs, and so the results might not be generalizable to other health-care settings

## Introduction

Norway introduced the regular general practitioner scheme in 2001, in which every inhabitant was assigned to an individual GP. GPs in Norway play a key role in the provision of health care, and are often the first contact point of patients with health services for most medical problems.<sup>1</sup> In 2018, The Ministry of Health and Care Services decided to evaluate the GP scheme, and part of this evaluation comprised a national patient experience survey.

The Norwegian Institute of Public Health (NIPH) is responsible for performing national patient experience surveys in Norway. Norway has a national program for monitoring and reporting on the quality of health care using patient experience surveys. The purpose of this program is to measure user experiences with health care systematically, with the obtained data used as a basis for interventions aimed at improving the quality of health care, health-care management, patient choice, and public accountability. The standard data-collection procedure in the national surveys is postdischarge mail surveys, which include a pen-and-paper questionnaire and an option to answer electronically. The results from two previous randomized studies and also studies of survey-mode preferences in different patient populations indicate that there is a rather modestly developed web mode preference overall.<sup>2-9</sup> However, the potential advantages of lower costs and shorter data-collection times are important arguments for performing further research into web-based surveys. Also, the expansion of Internet access and use may have changed the potential of the Internet to be an effective way to conduct such surveys. In Norway, the establishment of a national register with electronic contact information opens up new possibilities regarding electronic and web-based surveys, but so far this register has not been exploited in our national patient experience surveys.



1  
2  
3  
4  
5 The aim of the current study was to compare the standard mail survey mode of data collection  
6 with web-based data collection in Norway. The sample was randomized to one of two survey  
7 administration protocols: patients in Group A were mailed an invitation with both pen-and-  
8 paper and electronic response options, while those in Group B received an email invitation  
9 with an electronic response option only (using email addresses obtained from the national  
10 register). The response rates, data quality, background characteristics, and main study results  
11 were compared between the two groups.  
12  
13  
14  
15  
16  
17  
18  
19  
20  
21  
22  
23  
24  
25

## 26 **Methods**

### 27 **Data**

28  
29  
30 The sample consisted of patients aged 16 years and older registered with a GP in November  
31 2018. The sampling plan had a three-stage design and aimed to produce a nationally  
32 representative sample. First, regular GP practices were randomly selected after stratification  
33 by the number of GPs at the practices and the municipality types. Second, all of the GPs were  
34 included in the selected practices that had up to four GPs, while four of them were randomly  
35 selected in the practices that had five or more GPs. Third, we randomly selected 14 adult  
36 patients from the list of patients of each GP.  
37  
38  
39  
40  
41  
42  
43  
44  
45  
46  
47  
48  
49

50 This study included a total of 6,999 patients. Patients were randomized to 1 of 2 survey  
51 administration protocols: 4,999 patients to the main sample (Group A) and 2,000 patients to a  
52 subsample (Group B) (Fig. 1). Patients in Group A were mailed an invitation with both pen-  
53 and-paper and electronic response options, while those in Group B received an email  
54  
55  
56  
57  
58  
59  
60

1  
2  
3 invitation with an electronic response option only. Two reminders were sent to  
4  
5 nonrespondents in both samples using the same contact mode as for the first invitation.  
6  
7  
8  
9

10 Background data about the patients were obtained from public registries, including on gender,  
11  
12 age, the number of years on the patient list of a GP, and the number of consultations during  
13  
14 the past 24 months. Email addresses were collected from the national register for contact  
15  
16 information, which is operated by the Agency for Public Management and eGovernment.  
17  
18  
19

20  
21 The Data Protection Officer at the NIPH recommended that the study be approved, and it was  
22  
23 formally approved by the research director of the division for health services at the NIPH. The  
24  
25 Norwegian Directorate of Health approved the use of data about nonrespondents in the  
26  
27 nonresponse analysis, except those of patients who withdrew themselves from the study.  
28  
29  
30

### 31 32 33 **Measures**

34  
35 The Norwegian PEQ-GP (Patient Experiences with General Practitioner Questionnaire) was  
36  
37 applied. This instrument was developed and validated according to the standard scientific  
38  
39 procedures of the national patient-reported experience program in Norway.<sup>5,10</sup> A national  
40  
41 validation study identified five scales that covered important aspects of the GP service  
42  
43 relating to accessibility, evaluations of the GP and auxiliary staff, cooperation between the GP  
44  
45 and other services, and patient enablement. We included 17 additional items that were  
46  
47 relevant for evaluating the GP scheme. The questionnaire used in the randomized study  
48  
49 consisted of 47 questions on 6 pages. Thirty-seven questions addressed experiences with the  
50  
51 GP service, while ten were background questions. Most of the questions related to the user-  
52  
53 reported experiences were answered in a 5-point response format ranging from “not at all” to  
54  
55 “to a very large degree.” An additional page was included to allow the respondents to write  
56  
57  
58  
59  
60

1  
2  
3 comments relating to experiences with their GPs and wishes regarding future changes to the  
4  
5 GP scheme.  
6  
7  
8  
9

### 10 **Statistical analysis**

11  
12 Items were assessed for levels of missing data, ceiling effects, and internal consistency. The  
13  
14 internal consistency reliability of the five scales was assessed using the item-total correlation  
15  
16 and Cronbach's alpha. We set the cutoff criterion for ceiling effects to 50%; that is, an item  
17  
18 was considered acceptable if fewer than 50% of the respondents chose the most-favorable  
19  
20 response option.<sup>11,12</sup>  
21  
22  
23  
24  
25  
26

27 Differences in respondent characteristics between Group A and Group B were tested using  
28  
29 Pearson chi-square tests for categorical variables and independent-samples *t*-tests for  
30  
31 continuous variables. Differences between the two groups regarding patient-reported  
32  
33 experiences were tested using *t*-tests.  
34  
35  
36  
37

38 All of the statistical analyses were performed using SPSS (version 25.0).  
39  
40  
41  
42  
43

### 44 **Approval**

45  
46 The study was approved by the Data Protection Officer at the Norwegian Institute of Public  
47  
48 Health. Return of the questionnaire represented patient consent in the study, which is the  
49  
50 standard procedure in all patient experience surveys conducted by the Norwegian Institute of  
51  
52 Public Health.  
53  
54  
55  
56  
57  
58  
59  
60

## Patient and public involvement

The survey was about patients experiences with health care. Patients were included in the development process of the instrument, to secure that the questionnaire included the most important topics for patients.

## Results

The overall response rate was 42.6% in Group A and 18.3% in Group B (Table 1). Most of the respondents (70.9%) in Group A answered on paper. The initial response rate was around 10% lower for Group B than for group A, with the remaining difference being related to reduced effects of both the first and second reminders.

The levels of missing data, proportion of responses in the “not applicable” option, ceiling effects, and internal consistency for the items are presented in Table 2. The levels of missing data ranged from 1.6% to 18.7% in Group A, and from 0.0% to 17.1% in Group B. The proportions of responses in the “not applicable” category ranged from 3.0% to 29.4% in Group A, and from 1.6% to 31.9% in Group B, and were higher in Group A than in Group B for all items except for two on the enablement scale and the items on the coordination and cooperation scale. All scales and items were below the ceiling-effect criterion of 50% in Group A, but two items exceed the criterion in Group B: one about whether the GP takes the patient seriously (52.2%) and the other about whether the GP communicates in a way that the patient can understand (56.0%). Cronbach’s alpha values were similar in the two groups for four of the five indicators, but was lower (and below the criterion of 0.7) for the accessibility indicator in Group B. The remaining Cronbach’s alpha values were above 0.7.

1  
2  
3 Table 3 compares the background characteristics of the respondents in the two survey  
4 administration protocols. The respondent age, time since previous contact, and education level  
5  
6 differed significantly between the two groups, whereas there were no significant differences  
7  
8 in gender, number of years on the list of the GP, number of consultations, number of  
9  
10 diagnosis codes during the past 24 months, number of unique diagnosis codes the past 24  
11  
12 months, self-perceived physical health, self-perceived mental health, long-standing health  
13  
14 problems, or geographic origin. The proportion of patients aged 30–49 years was higher in  
15  
16 Group B than in Group A, and while Group A contained a higher proportion of patients who  
17  
18 were aged  $\geq 67$  years. The web respondents were more likely to report that they had been in  
19  
20 contact with their GP during the previous month. There was a significant tendency for those  
21  
22 who responded to the email invitation to have a higher education level than those who  
23  
24 responded to the mailed invitation: 61.5% of those in Group B reported being educated to the  
25  
26 university level, compared to 47.0% in Group A.  
27  
28  
29  
30  
31  
32  
33  
34

35 Differences in patient-reported experiences between the two groups were small, varying from  
36  
37 only 0.3 (GP is competent) to 3.5 (waiting time for urgent appointments is acceptable) on a  
38  
39 scale from 0 to 100 (Table 4). There were no significant differences in the 5 indicators  
40  
41 between the 2 groups, and only 1 of the 24 items was significantly different: the score for the  
42  
43 item about the helpfulness and competence of other employees at GP practices was  
44  
45 significantly higher in Group A than in Group B ( $p=0.046$ ).  
46  
47  
48  
49  
50  
51

## 52 Discussion

53  
54  
55 This study compared response rates, background characteristics, data quality, and main study  
56  
57 results between two randomized data-collection groups in a national survey of patient  
58  
59  
60

1  
2  
3 experiences with GPs. Patients in Group A were mailed an invitation with both pen-and-paper  
4 and electronic response options, while those in Group B received an email invitation with an  
5 electronic response option only. The response rate was 2.3-fold higher for the mail protocol  
6 than for the web-based protocol, but the patient-reported experiences were similar in the two  
7 groups.  
8  
9  
10  
11  
12  
13

14  
15  
16  
17 The results are consistent with literature reports that mail surveys achieve higher response  
18 rates than electronic and web-based approaches.<sup>2-9</sup> The current study of patient experiences  
19 with GPs is the first to explore a purely electronic protocol in the national program for  
20 monitoring and reporting on health-care quality using patient experience surveys in Norway.  
21 Web-based surveys have many advantages, including direct links to survey sites, ease of  
22 distribution, ease of receiving responses, and lower costs, but a major concern is that they  
23 exclude people without an email address as well as those with poor access to the Internet. The  
24 existence of a national register in Norway with electronic contact information presents a  
25 major opportunity for large-scale surveys of patient experiences, but as many as 15% of the  
26 patients in the electronic arm lacked a valid email address in the national register.  
27 Furthermore, only 18% of the contacted sample responded. A recent CAHPS survey produced  
28 corresponding results when comparing protocols based on web responses via an email  
29 invitation and mail.<sup>7</sup>  
30  
31  
32  
33  
34  
35  
36  
37  
38  
39  
40  
41  
42  
43  
44  
45  
46  
47  
48

49 The response rate alone is a poor predictor of nonresponse bias, and previous studies have  
50 failed to find a consistent association between response rates and sample  
51 representativeness.<sup>13,14</sup> However, low response rates threaten the legitimacy of surveys in both  
52 the clinical and public domains, and reduce the ability of surveys to identify important  
53 differences in patient-reported experiences between providers and over time.<sup>2,3</sup> Future  
54  
55  
56  
57  
58  
59  
60

1  
2  
3 research needs to focus on effective initiatives for increasing response rates in web-based  
4 protocols, including sending multiple reminders using a combination of emails, messages on  
5 mobile phones, and other available platforms. For example, the national infrastructure in  
6 Norway provides the possibility for secure digital mailboxes for all Norwegian inhabitants,  
7 which could be utilized for contacting digitally active patients. The current study showed that  
8 a lower education level and higher age were associated with a mail preference. Combined  
9 with the low response rates achieved for web-based protocols in this and other studies, future  
10 representative and high-quality surveys should include the opportunity to answer on pen-and-  
11 paper questionnaires. This could be implemented in a mixed-mode design that provides  
12 respondents with the option to choose how they want to respond, making it possible for  
13 patients without Internet access or sufficient computer skills to also participate.  
14  
15  
16  
17  
18  
19  
20  
21  
22  
23  
24  
25  
26  
27  
28  
29  
30

31 The effects of background characteristics reported in the literature are inconsistent.<sup>2-9</sup> The  
32 results from two previous randomized studies showed similar background characteristics for  
33 respondents in different randomized groups.<sup>2,3</sup> However, the respondents in those surveys  
34 were all contacted by mail. In the current study we found that respondents invited by email  
35 were younger, more educated, and more likely to have had more-recent contact with their GP.  
36 We found no significant intergroup differences in the remaining nine background variables.  
37 Future research should assess how the national infrastructure in Norway could be used to  
38 tailor the mode of data collection to different groups, such as by providing a range of data-  
39 collection modes from purely electronic strategies (for respondents with high education  
40 levels) to a mail-based mixed mode (to older respondents and those with low education  
41 levels). The present and previous studies have revealed that patient-reported experiences are  
42 quite similar for different data-collection modes, but obviously the effects of the fragmented  
43 data-collection strategies remain to be determined.  
44  
45  
46  
47  
48  
49  
50  
51  
52  
53  
54  
55  
56  
57  
58  
59  
60

1  
2  
3  
4  
5 A limitation of this study is that it only included adults evaluating their GPs in Norway, and  
6  
7 so the results might not be generalizable to other health-care settings and countries. In  
8  
9 particular, the national infrastructure and the digital maturity of the population in Norway  
10  
11 might differ from the characteristics of other countries. However, the results should be  
12  
13 applicable to health systems with similar infrastructures and digital maturities, and also to  
14  
15 countries working to establish regional or national digital infrastructures.  
16  
17  
18  
19  
20  
21  
22

## 23 **Conclusions**

24  
25 Administering a survey of patient experiences with GPs using a web-based protocol produced  
26  
27 results that were very similar to those obtained using the standard mail-mode data-collection  
28  
29 procedure that is used in the national surveys, but had a much lower response rate.  
30  
31 Furthermore, respondents in the digital group were younger, more educated, and had more-  
32  
33 recent experiences with their GPs. Web-based surveys are faster and cheaper than standard  
34  
35 mail surveys, but their low response rates threaten their legitimacy. Initiatives to increase  
36  
37 response rates for web-based data collection and strategies for tailoring data collection to  
38  
39 different groups should be key elements in future research.  
40  
41  
42  
43  
44  
45  
46  
47

## 48 **Funding**

49  
50  
51 This research received grant from the Norwegian Ministry of Health and Care Services.  
52  
53  
54

## 55 **Competing interests**

56  
57  
58 On behalf of all authors, the corresponding author states that there is no competing interests.  
59  
60



## Author contributions

The Ministry of Health and Care Services initiated the study. H.H.I. planned the study in consultation with O.A.B. and O.H. H.H.I. performed the statistical analyses with O.A.B. and O.H., and drafted the manuscript. O.A.B. and O.H. participated in the planning process, critically revised the manuscript draft and approved the final version of the manuscript. H.H.I. was the project manager for the survey. All authors read and approved the final manuscript.

## Acknowledgements

We thank Inger Opedal Paulsrud from the Knowledge Centre at the NIPH for her help in conducting the survey, including performing administrative and technical tasks for the data collection.

## Availability of data and material

The data set generated and/or analysed during this study is not publicly available due to the need to protect personal data.

## References

1. Eide TB, Straand J, Rosvold EO. Patients' and GPs' expectations regarding healthcare-seeking behaviour: a Norwegian comparative study. *BJGP Open*. 2018;2(4):bjgpopen18X101615.
2. Bjertnaes OA, Iversen HH. User-experience surveys with maternity services: a randomized comparison of two data collection models. *Int J Qual Health Care*. 2012;24(4):433–8.
3. Bjertnaes O, Iversen HH, Skrivarhaug T. A randomized comparison of three data collection models for the measurement of parent experiences with diabetes outpatient care. *BMC Med Res Methodol*. 2018;18 (1):95.
4. Holmboe O, Bjertnæs OA. Patient experiences with Norwegian hospitals in 2015. Results following a national survey. Oslo: Norwegian Knowledge Centre for the Health Services, PasOpp-report 147; 2016. ISSN 1890-1565.
5. Holmboe O, Danielsen K, Iversen HH. Development of a method for the measurement of patient experiences with regular general practitioners. Oslo: Norwegian Knowledge Centre for the Health Services, PasOpp-report 1; 2015. ISSN 1890-1565.
6. Danielsen K, Holmboe O, Hansen SL, Førland O, Bjertnæs OA. Patient experiences with Norwegian primary care out-of-hours clinics. Oslo: Results from a survey among the “Vakttårn” clinics. Norwegian Knowledge Centre for the Health Services, PasOpp-report 1; 2012. ISSN 1890-1565.
7. Fowler FJ Jr, Cosenza C, Cripps LA, Edgman-Levitan S, Cleary PD. The effect of administration mode on CAHPS survey response rates and results: a comparison of mail and web-based approaches. *Health Serv Res*. 2019;54(3):714–21.
8. Bergeson SC, Gray J, Ehrmantraut LA, Laibson T, Hays RD. Comparing web-based with mail survey administration of the Consumer Assessment of Healthcare Providers

- 1  
2  
3 and Systems (CAHPS(®)) Clinician and Group survey. *Prim Health Care*.  
4  
5 2013;3:1000132.  
6  
7  
8 9. Rodriguez HP, von Glahn T, Rogers WH, Chang H, Fanjiang G, Safran DG.  
9  
10 Evaluating patients' experiences with individual physicians: a randomized trial of  
11  
12 mail, internet, and interactive voice response telephone administration of surveys.  
13  
14 *Med Care*. 2006;44(2):167–74.  
15  
16  
17 10. Holmboe O, Iversen HH, Danielsen K, Bjertnaes O. The Norwegian patient  
18  
19 experiences with GP questionnaire (PEQ-GP): reliability and construct validity  
20  
21 following a national survey. *BMJ Open*. 2017;7(9):e016644.  
22  
23  
24 11. Bjertnaes OA, Lyngstad I, Malterud K, Garratt A. The Norwegian EUROPEP  
25  
26 questionnaire for patient evaluation of general practice: data quality, reliability and  
27  
28 construct validity. *Fam Pract*. 2011;28(3):342–9.  
29  
30  
31 12. Ruiz MA, Pardo A, Rejas J, Soto J, Villasante F, Aranguren JL. Development and  
32  
33 validation of the “Treatment Satisfaction with Medicines Questionnaire” (SATMED-  
34  
35 Q). *Value Health*. 2008;11(5):913–26.  
36  
37  
38 13. Groves RM, Peytcheva E. The impact of nonresponse rates on nonresponse bias: a  
39  
40 meta-analysis. *Public Opin Q*. 2008;72(2):167–89.  
41  
42  
43 14. Groves RM. Nonresponse rates and nonresponse bias in household surveys. *Public*  
44  
45 *Opin Q*. 2006;70(5):646–75.  
46  
47  
48  
49  
50  
51  
52  
53  
54  
55  
56  
57  
58  
59  
60

1  
2  
3  
4 **Figure 1:** CONSORT flow diagram  
5  
6  
7  
8  
9  
10  
11  
12  
13  
14  
15  
16  
17  
18  
19  
20  
21  
22  
23  
24  
25  
26  
27  
28  
29  
30  
31  
32  
33  
34  
35  
36  
37  
38  
39  
40  
41  
42  
43  
44  
45  
46  
47  
48  
49  
50  
51  
52  
53  
54  
55  
56  
57  
58  
59  
60

For peer review only

**Table 1:** Respondents before and after each reminder in the two randomized groups, and final response rates.

|                                           | Group A (n=4,760) | Group B (n=1,694) |
|-------------------------------------------|-------------------|-------------------|
| <i>Respondents before reminder:</i>       |                   |                   |
| Electronic, n                             | 272               | 117               |
| Paper, n                                  | 560               | -                 |
| Response rate, %                          | 17.5              | 6.9               |
| <i>Respondents after first reminder:</i>  |                   |                   |
| Electronic, n                             | 171               | 126               |
| Paper, n                                  | 533               | -                 |
| Increase in response rate, %              | 14.8              | 7.4               |
| <i>Respondents after second reminder:</i> |                   |                   |
| Electronic, n                             | 148               | 67                |
| Paper, n                                  | 345               | -                 |
| Increase in response rate, %              | 10.4              | 4.0               |
| <i>Total:</i>                             |                   |                   |
| Electronic, n (%)                         | 591 (29.1)        | 310               |
| Paper, n (%)                              | 1438 (70.9)       | -                 |
| Response rate, %                          | 42.6              | 18.3              |

For peer review only

**Table 2:** Comparison of missing data, ceiling effects, and internal consistency between the two randomized groups.

| Scale and item <sup>a</sup>                                                                          | Group A          |                    |                     |                                         | Group B          |                    |                     |                                         |
|------------------------------------------------------------------------------------------------------|------------------|--------------------|---------------------|-----------------------------------------|------------------|--------------------|---------------------|-----------------------------------------|
|                                                                                                      | Missing data (%) | Not applicable (%) | Ceiling effects (%) | Cronbach's alpha/item-total correlation | Missing data (%) | Not applicable (%) | Ceiling effects (%) | Cronbach's alpha/item-total correlation |
| <i>GP</i>                                                                                            |                  |                    |                     | <b>0.924</b>                            |                  |                    |                     | <b>0.935</b>                            |
| Do you feel that your GP takes you seriously?                                                        | 5.0              | 3.4                | 48.0                | 0.762                                   | 0.0              | 2.9                | 52.2                | 0.813                                   |
| Do you feel that your GP spends enough time with you?                                                | 4.9              | 3.2                | 28.9                | 0.702                                   | 0.0              | 3.2                | 32.7                | 0.745                                   |
| Do you feel that your GP talks to you in a way you understand?                                       | 5.1              | 3.0                | 48.9                | 0.737                                   | 0.3              | 2.3                | 56.0                | 0.735                                   |
| Do you feel that your GP is professionally competent?                                                | 5.2              | 4.0                | 41.8                | 0.752                                   | 0.6              | 2.9                | 43.1                | 0.805                                   |
| Do you feel that your GP shows interest in your situation?                                           | 5.3              | 3.5                | 39.5                | 0.818                                   | 0.6              | 2.3                | 39.9                | 0.853                                   |
| Do you feel that your GP includes you as much as you would like in decisions concerning you?         | 5.7              | 7.7                | 37.2                | 0.769                                   | 0.3              | 6.5                | 41.9                | 0.803                                   |
| Does your GP provide you with sufficient information about your health problems and their treatment? | 5.6              | 7.3                | 32.7                | 0.811                                   | 0.3              | 6.1                | 34.1                | 0.835                                   |
| Does your GP provide you with sufficient information about the use and side effects of medication?   | 5.4              | 16.3               | 21.0                | 0.631                                   | 0.0              | 16.5               | 24.3                | 0.655                                   |
| Does your GP refer you to further examinations or a specialist when you feel you need it?            | 5.1              | 10.6               | 43.2                | 0.646                                   | 0.3              | 10.6               | 49.3                | 0.633                                   |
| <i>Organization and auxiliary staff</i>                                                              |                  |                    |                     | <b>0.868</b>                            |                  |                    |                     | <b>0.851</b>                            |
| Do you feel that your GP's practice is well organized?                                               | 5.2              | 4.1                | 26.6                | 0.681                                   | 1.0              | 1.6                | 25.8                | 0.615                                   |
| Do you feel the other employees are helpful and competent?                                           | 4.9              | 3.6                | 36.1                | 0.813                                   | 0.3              | 2.9                | 31.7                | 0.806                                   |
| Are you treated with courtesy and respect at the reception?                                          | 4.8              | 3.2                | 40.9                | 0.752                                   | 0.3              | 2.6                | 39.5                | 0.750                                   |
| <i>Accessibility</i>                                                                                 |                  |                    |                     | <b>0.774</b>                            |                  |                    |                     | <b>0.688</b>                            |
| Was the waiting time for your last urgent appointment acceptable?                                    | 18.7             | -                  | 36.2                | 0.631                                   | 17.1             | -                  | 33.5                | 0.525                                   |
| Is this waiting time for appointments that are not urgent acceptable?                                | 12.3             | -                  | 18.0                | 0.631                                   | 6.8              | -                  | 11.4                | 0.525                                   |
| <i>Enablement</i>                                                                                    |                  |                    |                     | <b>0.906</b>                            |                  |                    |                     | <b>0.925</b>                            |
| Does contact with your GP make you better able to understand your health problems?                   | 1.6              | 16.6               | 19.5                | 0.803                                   | 1.0              | 15.8               | 26.0                | 0.836                                   |
| Does contact with your GP make you better able to cope with your health problems?                    | 1.6              | 19.7               | 16.3                | 0.852                                   | 0.6              | 20.3               | 21.2                | 0.875                                   |
| Does contact with your GP better help you to stay healthy?                                           | 1.6              | 19.8               | 15.1                | 0.786                                   | 0.3              | 20.6               | 21.6                | 0.833                                   |
| <i>Coordination and cooperation</i>                                                                  |                  |                    |                     | <b>0.875</b>                            |                  |                    |                     | <b>0.876</b>                            |
| Do you feel that your GP is good at coordinating the range of health services available to you?      | 5.9              | 26.9               | 28.1                | 0.779                                   | 0.6              | 30.6               | 34.7                | 0.790                                   |
| Do you feel that your GP cooperates well with other services you need?                               | 5.7              | 29.4               | 29.0                | 0.779                                   | 0.6              | 31.9               | 29.7                | 0.790                                   |

<sup>a</sup>All items were scored on a 5-point response scale ranging from 1 ("not at all") to 5 ("to a very large degree")

**Table 3:** Comparison of respondent characteristics between the two randomized groups.

|                                                              | Group A     | Group B    | p <sup>a</sup> |
|--------------------------------------------------------------|-------------|------------|----------------|
| Gender, female                                               | 55.9 (1135) | 59.7 (185) | 0.216          |
| Age group                                                    |             |            | <0.001         |
| 16–19 years                                                  | 2.4 (49)    | 2.3 (7)    |                |
| 20–29 years                                                  | 7.8 (158)   | 9.4 (29)   |                |
| 30–49 years                                                  | 23.8 (482)  | 37.4 (116) |                |
| 50–66 years                                                  | 34.2 (694)  | 31.6 (98)  |                |
| ≥67 years                                                    | 31.8 (646)  | 19.4 (60)  |                |
| Time on the list of the GP                                   |             |            | 0.526          |
| <1 year                                                      | 9.4 (191)   | 8.4 (26)   |                |
| 1–2 years                                                    | 19.4 (392)  | 21.3 (66)  |                |
| 3–4 years                                                    | 14.5 (293)  | 16.1 (50)  |                |
| 5–10 years                                                   | 20.4 (414)  | 22.3 (69)  |                |
| ≥11 years                                                    | 36.3 (735)  | 31.9 (99)  |                |
| Number of consultations during past 12 months                |             |            | 0.672          |
| 0                                                            | 9.3 (186)   | 10.1 (31)  |                |
| 1                                                            | 15.7 (314)  | 15.3 (47)  |                |
| 2–5                                                          | 55.7 (1114) | 52.1 (160) |                |
| 6–12                                                         | 16.2 (323)  | 19.2 (59)  |                |
| ≥13                                                          | 3.1 (63)    | 3.3 (10)   |                |
| Number of diagnosis codes during past 24 months              | 13.8±13.5   | 12.6±10.7  | 0.083          |
| Number of unique diagnosis codes during past 24 months       | 4.7±3.2     | 4.6±2.8    | 0.510          |
| Time since previous contact                                  |             |            | 0.042          |
| <1 month                                                     | 36.5 (716)  | 42.1 (128) |                |
| 1–3 months                                                   | 32.0 (628)  | 23.7 (72)  |                |
| 4–6 months                                                   | 13.5 (266)  | 15.1 (46)  |                |
| 7–12 months                                                  | 9.7 (191)   | 8.9 (27)   |                |
| >12 months                                                   | 8.3 (163)   | 10.2 (31)  |                |
| Self-perceived physical health                               |             |            | 0.951          |
| Very poor                                                    | 1.3 (27)    | 1.6 (5)    |                |
| Quite poor                                                   | 5.3 (108)   | 5.2 (16)   |                |
| Both poor and good                                           | 23.8 (481)  | 22.4 (69)  |                |
| Quite good                                                   | 48.3 (975)  | 50.3 (155) |                |
| Very good                                                    | 21.2 (429)  | 20.5 (63)  |                |
| Self-perceived mental health                                 |             |            | 0.475          |
| Very poor                                                    | 1.1 (22)    | 1.9 (6)    |                |
| Quite poor                                                   | 3.0 (60)    | 3.9 (12)   |                |
| Both poor and good                                           | 15.5 (313)  | 15.6 (48)  |                |
| Quite good                                                   | 41.7 (842)  | 38.0 (117) |                |
| Very good                                                    | 38.7 (781)  | 40.6 (125) |                |
| Long-standing health problems                                |             |            | 0.625          |
| 0                                                            | 35.7 (708)  | 37.5 (115) |                |
| 1                                                            | 32.9 (653)  | 34.9 (107) |                |
| 2                                                            | 19.3 (383)  | 16.9 (52)  |                |
| ≥3                                                           | 12.1 (241)  | 10.7 (33)  |                |
| Education level                                              |             |            | <0.001         |
| Elementary school                                            | 15.6 (309)  | 7.1 (22)   |                |
| High school                                                  | 37.4 (740)  | 31.4 (97)  |                |
| University, 0–4 years                                        | 25.6 (505)  | 35.3 (109) |                |
| University, >4 years                                         | 21.4 (422)  | 26.2 (81)  |                |
| Geographic origin                                            |             |            | 0.205          |
| Norway                                                       | 88.6 (1756) | 89.9 (276) |                |
| Asia (incl. Turkey), Africa, or Latin America                | 4.8 (95)    | 3.3 (10)   |                |
| Eastern Europe (all countries, independent of EU membership) | 3.5 (70)    | 2.3 (7)    |                |
| Western Europe, North America, or Oceania                    | 3.0 (60)    | 4.6 (14)   |                |

<sup>a</sup> Pearson chi-square tests for categorical variables and independent-samples t-tests for continuous variables. Data are n (%) or mean±SD values.

**Table 4:** Comparison of patient-reported experiences between the two randomized groups.

| Scale and item <sup>a</sup>                                                                          | Group A          | Group B          | p            |
|------------------------------------------------------------------------------------------------------|------------------|------------------|--------------|
| <i>GP</i>                                                                                            | <b>78.3±16.8</b> | <b>78.8±17.8</b> | <b>0.651</b> |
| Do you feel that your GP takes you seriously?                                                        | 83.1±19.8        | 84.1±20.3        | 0.429        |
| Do you feel that your GP spends enough time with you?                                                | 73.8±22.8        | 73.3±25.8        | 0.707        |
| Do you feel that your GP talks to you in a way you understand?                                       | 84.6±17.7        | 85.8±19.1        | 0.275        |
| Do you feel that your GP is professionally competent?                                                | 82.1±18.0        | 81.8±19.4        | 0.747        |
| Do you feel that your GP shows interest in your situation?                                           | 79.7±20.5        | 78.7±22.2        | 0.435        |
| Do you feel that your GP includes you as much as you would like in decisions concerning you?         | 79.0±20.3        | 80.0±21.3        | 0.452        |
| Does your GP provide you with sufficient information about your health problems and their treatment? | 76.6±21.2        | 76.1±22.2        | 0.708        |
| Does your GP provide you with sufficient information about the use and side effects of medication?   | 65.0±26.9        | 67.1±26.0        | 0.241        |
| Does your GP refer you to further examination or a specialist when you feel you need it?             | 81.4±20.2        | 82.0±22.2        | 0.712        |
| <i>Organization and auxiliary staff</i>                                                              | <b>78.2±17.7</b> | <b>77.1±18.2</b> | <b>0.322</b> |
| Do you feel that your GP's practice is well organized?                                               | 75.2±20.2        | 74.8±20.4        | 0.735        |
| Do you feel the other employees are helpful and competent?                                           | 79.3±19.2        | 76.9±20.8        | 0.046        |
| Are you treated with courtesy and respect at the reception?                                          | 80.9±19.7        | 79.9±20.7        | 0.430        |
| <i>Accessibility</i>                                                                                 | <b>63.6±27.8</b> | <b>61.8±25.5</b> | <b>0.264</b> |
| Was the waiting time for your last urgent appointment acceptable?                                    | 69.5±30.6        | 69.1±30.4        | 0.828        |
| Is this waiting time for appointments that are not urgent acceptable?                                | 58.3±30.0        | 54.8±28.5        | 0.051        |
| <i>Enablement</i>                                                                                    | <b>65.2±22.1</b> | <b>66.0±24.3</b> | <b>0.601</b> |
| Does contact with your GP make you better able to understand your health problems?                   | 68.1±23.0        | 68.7±25.1        | 0.703        |
| Does contact with your GP make you better able to cope with your health problems?                    | 64.9±24.0        | 65.9±25.6        | 0.560        |
| Does contact with your GP better help you to stay healthy?                                           | 62.7±25.0        | 64.5±26.7        | 0.303        |
| <i>Coordination and cooperation</i>                                                                  | <b>74.3±21.0</b> | <b>74.9±21.5</b> | <b>0.644</b> |
| Do you feel that your GP is good at coordinating the range of health services available to you?      | 75.0±21.2        | 77.7±20.5        | 0.079        |
| Do you feel that your GP cooperates well with other services you need?                               | 74.3±22.6        | 73.0±24.5        | 0.434        |

<sup>a</sup>All scales and items are scored from 0 to 100, where 100 is the best possible patient experience. Data are mean±SD values.



Figure 1: CONSORT flow diagram

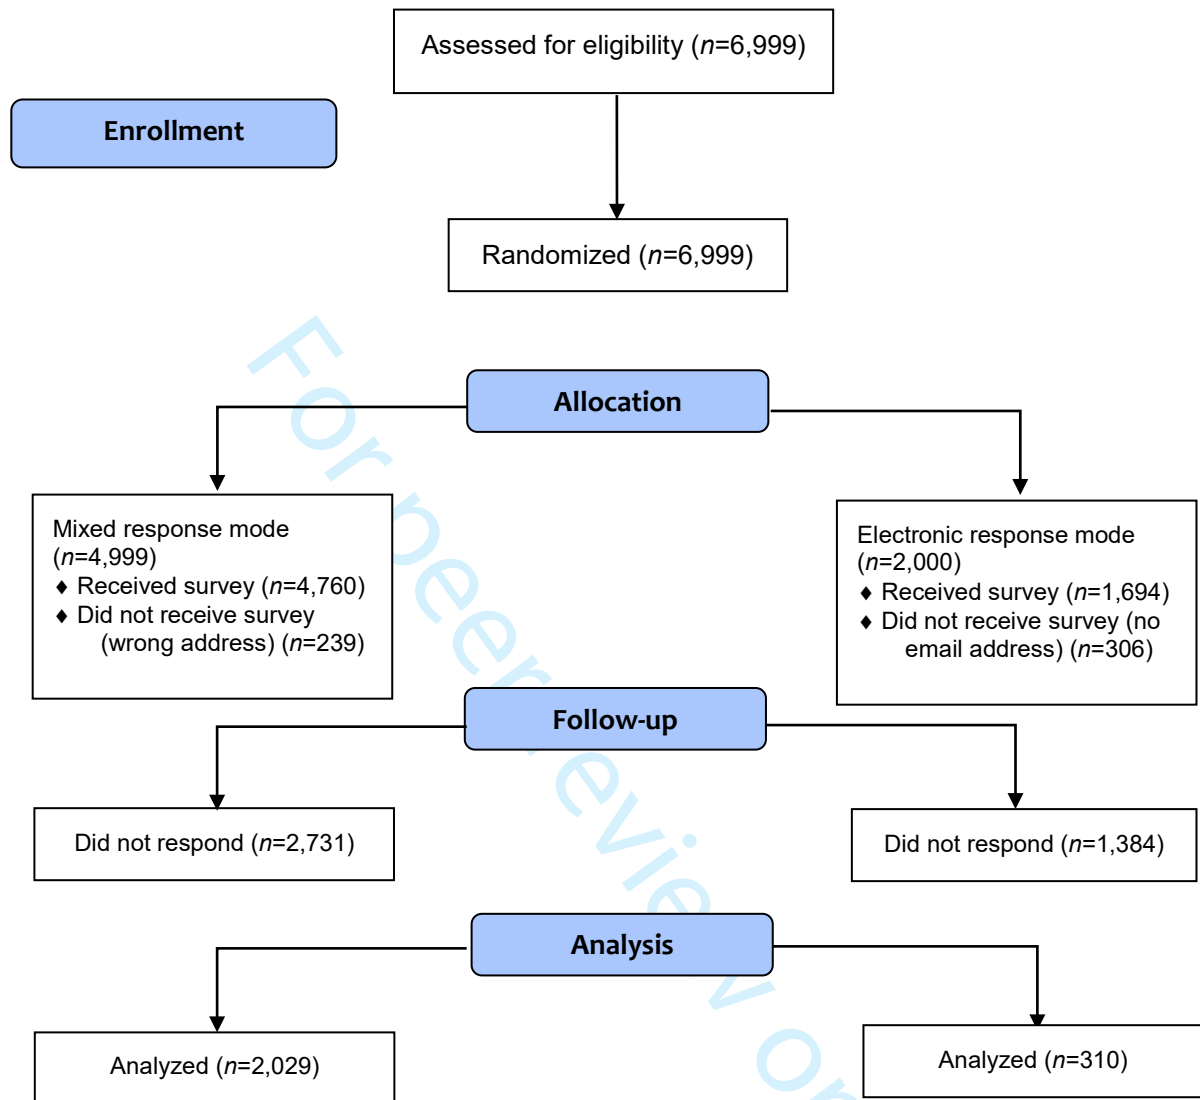

# Reporting checklist for cross sectional study.

Based on the STROBE cross sectional guidelines.

## Instructions to authors

Complete this checklist by entering the page numbers from your manuscript where readers will find each of the items listed below.

Your article may not currently address all the items on the checklist. Please modify your text to include the missing information. If you are certain that an item does not apply, please write "n/a" and provide a short explanation.

Upload your completed checklist as an extra file when you submit to a journal.

In your methods section, say that you used the STROBE cross sectional reporting guidelines, and cite them as:

von Elm E, Altman DG, Egger M, Pocock SJ, Gøtzsche PC, Vandenbroucke JP. The Strengthening the Reporting of Observational Studies in Epidemiology (STROBE) Statement: guidelines for reporting observational studies.

|                           |                     | Reporting Item                                                                                                                  | Page Number |
|---------------------------|---------------------|---------------------------------------------------------------------------------------------------------------------------------|-------------|
| <b>Title and abstract</b> |                     |                                                                                                                                 |             |
| Title                     | <a href="#">#1a</a> | Indicate the study's design with a commonly used term in the title or the abstract                                              | 2           |
| Abstract                  | <a href="#">#1b</a> | Provide in the abstract an informative and balanced summary of what was done and what was found                                 | 2,3         |
| <b>Introduction</b>       |                     |                                                                                                                                 |             |
| Background / rationale    | <a href="#">#2</a>  | Explain the scientific background and rationale for the investigation being reported                                            | 5-6         |
| Objectives                | <a href="#">#3</a>  | State specific objectives, including any prespecified hypotheses                                                                | 2,6         |
| <b>Methods</b>            |                     |                                                                                                                                 |             |
| Study design              | <a href="#">#4</a>  | Present key elements of study design early in the paper                                                                         | 2, 6/7      |
| Setting                   | <a href="#">#5</a>  | Describe the setting, locations, and relevant dates, including periods of recruitment, exposure, follow-up, and data collection | 6-8         |
| Eligibility criteria      | <a href="#">#6a</a> | Give the eligibility criteria, and the sources and methods of selection of participants.                                        | 2, 6-8      |

|    |                     |                      |                                                                                                                                                                              |          |
|----|---------------------|----------------------|------------------------------------------------------------------------------------------------------------------------------------------------------------------------------|----------|
| 1  |                     | <a href="#">#7</a>   | Clearly define all outcomes, exposures, predictors, potential confounders, and effect modifiers. Give diagnostic criteria, if applicable                                     | 7,8      |
| 2  |                     |                      |                                                                                                                                                                              |          |
| 3  |                     |                      |                                                                                                                                                                              |          |
| 4  |                     |                      |                                                                                                                                                                              |          |
| 5  | Data sources /      | <a href="#">#8</a>   | For each variable of interest give sources of data and details of methods of assessment                                                                                      | 7,8      |
| 6  | measurement         |                      | (measurement). Describe comparability of assessment methods if there is more than one group. Give information separately for for exposed and unexposed groups if applicable. |          |
| 7  |                     |                      |                                                                                                                                                                              |          |
| 8  |                     |                      |                                                                                                                                                                              |          |
| 9  |                     |                      |                                                                                                                                                                              |          |
| 10 | Bias                | <a href="#">#9</a>   | Describe any efforts to address potential sources of bias                                                                                                                    | 11-13    |
| 11 |                     |                      |                                                                                                                                                                              |          |
| 12 | Study size          | <a href="#">#10</a>  | Explain how the study size was arrived at                                                                                                                                    | 6,7      |
| 13 |                     |                      |                                                                                                                                                                              |          |
| 14 |                     |                      |                                                                                                                                                                              |          |
| 15 | Quantitative        | <a href="#">#11</a>  | Explain how quantitative variables were handled in the analyses. If applicable, describe                                                                                     | 6-8      |
| 16 | variables           |                      | which groupings were chosen, and why                                                                                                                                         |          |
| 17 |                     |                      |                                                                                                                                                                              |          |
| 18 |                     |                      |                                                                                                                                                                              |          |
| 19 | Statistical methods | <a href="#">#12a</a> | Describe all statistical methods, including those used to control for confounding                                                                                            | 7-8      |
| 20 |                     |                      |                                                                                                                                                                              |          |
| 21 | Statistical methods | <a href="#">#12b</a> | Describe any methods used to examine subgroups and interactions                                                                                                              | 6-8      |
| 22 |                     |                      |                                                                                                                                                                              |          |
| 23 | Statistical methods | <a href="#">#12c</a> | Explain how missing data were addressed                                                                                                                                      | 7,8,19   |
| 24 |                     |                      |                                                                                                                                                                              |          |
| 25 |                     |                      |                                                                                                                                                                              |          |
| 26 | Statistical methods | <a href="#">#12d</a> | If applicable, describe analytical methods taking account of sampling strategy                                                                                               | 6        |
| 27 |                     |                      |                                                                                                                                                                              |          |
| 28 | Statistical methods | <a href="#">#12e</a> | Describe any sensitivity analyses                                                                                                                                            | n/a      |
| 29 |                     |                      |                                                                                                                                                                              |          |
| 30 |                     |                      |                                                                                                                                                                              |          |
| 31 | <b>Results</b>      |                      |                                                                                                                                                                              |          |
| 32 |                     |                      |                                                                                                                                                                              |          |
| 33 | Participants        | <a href="#">#13a</a> | Report numbers of individuals at each stage of study—eg numbers potentially eligible,                                                                                        | 6,7,17   |
| 34 |                     |                      | examined for eligibility, confirmed eligible, included in the study, completing follow-up, and                                                                               |          |
| 35 |                     |                      | analysed. Give information separately for for exposed and unexposed groups if applicable.                                                                                    |          |
| 36 |                     |                      |                                                                                                                                                                              |          |
| 37 |                     |                      |                                                                                                                                                                              |          |
| 38 | Participants        | <a href="#">#13b</a> | Give reasons for non-participation at each stage                                                                                                                             | 17       |
| 39 |                     |                      |                                                                                                                                                                              |          |
| 40 |                     |                      |                                                                                                                                                                              |          |
| 41 | Participants        | <a href="#">#13c</a> | Consider use of a flow diagram                                                                                                                                               | 17       |
| 42 |                     |                      |                                                                                                                                                                              |          |
| 43 | Descriptive data    | <a href="#">#14a</a> | Give characteristics of study participants (eg demographic, clinical, social) and information                                                                                | 9,10,20  |
| 44 |                     |                      | on exposures and potential confounders. Give information separately for exposed and                                                                                          |          |
| 45 |                     |                      | unexposed groups if applicable.                                                                                                                                              |          |
| 46 |                     |                      |                                                                                                                                                                              |          |
| 47 |                     |                      |                                                                                                                                                                              |          |
| 48 | Descriptive data    | <a href="#">#14b</a> | Indicate number of participants with missing data for each variable of interest                                                                                              | 19       |
| 49 |                     |                      |                                                                                                                                                                              |          |
| 50 |                     |                      |                                                                                                                                                                              |          |
| 51 | Outcome data        | <a href="#">#15</a>  | Report numbers of outcome events or summary measures. Give information separately for                                                                                        | 18,19,21 |
| 52 |                     |                      | exposed and unexposed groups if applicable.                                                                                                                                  |          |
| 53 |                     |                      |                                                                                                                                                                              |          |
| 54 |                     |                      |                                                                                                                                                                              |          |
| 55 | Main results        | <a href="#">#16a</a> | Give unadjusted estimates and, if applicable, confounder-adjusted estimates and their                                                                                        | n/a      |
| 56 |                     |                      | precision (eg, 95% confidence interval). Make clear which confounders were adjusted for                                                                                      |          |
| 57 |                     |                      | and why they were included                                                                                                                                                   |          |
| 58 |                     |                      |                                                                                                                                                                              |          |
| 59 |                     |                      |                                                                                                                                                                              |          |
| 60 |                     |                      |                                                                                                                                                                              |          |

|    |                    |                      |                                                                                                  |       |
|----|--------------------|----------------------|--------------------------------------------------------------------------------------------------|-------|
| 1  | Main results       | <a href="#">#16b</a> | Report category boundaries when continuous variables were categorized                            | n/a   |
| 2  |                    |                      |                                                                                                  |       |
| 3  | Main results       | <a href="#">#16c</a> | If relevant, consider translating estimates of relative risk into absolute risk for a meaningful | n/a   |
| 4  |                    |                      | time period                                                                                      |       |
| 5  |                    |                      |                                                                                                  |       |
| 6  |                    |                      |                                                                                                  |       |
| 7  | Other analyses     | <a href="#">#17</a>  | Report other analyses done—e.g., analyses of subgroups and interactions, and sensitivity         | n/a   |
| 8  |                    |                      | analyses                                                                                         |       |
| 9  |                    |                      |                                                                                                  |       |
| 10 |                    |                      |                                                                                                  |       |
| 11 | <b>Discussion</b>  |                      |                                                                                                  |       |
| 12 |                    |                      |                                                                                                  |       |
| 13 | Key results        | <a href="#">#18</a>  | Summarise key results with reference to study objectives                                         | 10,11 |
| 14 |                    |                      |                                                                                                  |       |
| 15 | Limitations        | <a href="#">#19</a>  | Discuss limitations of the study, taking into account sources of potential bias or imprecision.  | 12,13 |
| 16 |                    |                      | Discuss both direction and magnitude of any potential bias.                                      |       |
| 17 |                    |                      |                                                                                                  |       |
| 18 |                    |                      |                                                                                                  |       |
| 19 | Interpretation     | <a href="#">#20</a>  | Give a cautious overall interpretation considering objectives, limitations, multiplicity of      | 10-13 |
| 20 |                    |                      | analyses, results from similar studies, and other relevant evidence.                             |       |
| 21 |                    |                      |                                                                                                  |       |
| 22 |                    |                      |                                                                                                  |       |
| 23 | Generalisability   | <a href="#">#21</a>  | Discuss the generalisability (external validity) of the study results                            | 12,13 |
| 24 |                    |                      |                                                                                                  |       |
| 25 |                    |                      |                                                                                                  |       |
| 26 | <b>Other</b>       |                      |                                                                                                  |       |
| 27 | <b>Information</b> |                      |                                                                                                  |       |
| 28 |                    |                      |                                                                                                  |       |
| 29 |                    |                      |                                                                                                  |       |
| 30 | Funding            | <a href="#">#22</a>  | Give the source of funding and the role of the funders for the present study and, if applicable, | 13    |
| 31 |                    |                      | for the original study on which the present article is based                                     |       |
| 32 |                    |                      |                                                                                                  |       |
| 33 |                    |                      |                                                                                                  |       |

The STROBE checklist is distributed under the terms of the Creative Commons Attribution License CC-BY. This checklist was completed on 07. June 2019 using <https://www.goodreports.org/>, a tool made by the [EQUATOR Network](#) in collaboration with [Penelope.ai](#)

# BMJ Open

## Patient-reported experiences with general practitioners: a randomized study of mail and web-based approaches following a national survey

|                                 |                                                                                                                                                                                                                                                               |
|---------------------------------|---------------------------------------------------------------------------------------------------------------------------------------------------------------------------------------------------------------------------------------------------------------|
| Journal:                        | <i>BMJ Open</i>                                                                                                                                                                                                                                               |
| Manuscript ID                   | bmjopen-2019-036533.R1                                                                                                                                                                                                                                        |
| Article Type:                   | Original research                                                                                                                                                                                                                                             |
| Date Submitted by the Author:   | 18-Jun-2020                                                                                                                                                                                                                                                   |
| Complete List of Authors:       | Iversen, Hilde; Norwegian Institute of Public Health, Division of Health Services<br>Holmboe, Olaf; Norwegian Institute of Public Health, Division of Health Services<br>Bjertnaes, Oyvind; Norwegian Institute of Public Health, Division of Health Services |
| <b>Primary Subject Heading</b>: | Research methods                                                                                                                                                                                                                                              |
| Secondary Subject Heading:      | Health services research                                                                                                                                                                                                                                      |
| Keywords:                       | PRIMARY CARE, STATISTICS & RESEARCH METHODS, Quality in health care < HEALTH SERVICES ADMINISTRATION & MANAGEMENT                                                                                                                                             |
|                                 |                                                                                                                                                                                                                                                               |

SCHOLARONE™  
Manuscripts

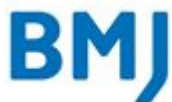

I, the Submitting Author has the right to grant and does grant on behalf of all authors of the Work (as defined in the below author licence), an exclusive licence and/or a non-exclusive licence for contributions from authors who are: i) UK Crown employees; ii) where BMJ has agreed a CC-BY licence shall apply, and/or iii) in accordance with the terms applicable for US Federal Government officers or employees acting as part of their official duties; on a worldwide, perpetual, irrevocable, royalty-free basis to BMJ Publishing Group Ltd ("BMJ") its licensees and where the relevant Journal is co-owned by BMJ to the co-owners of the Journal, to publish the Work in this journal and any other BMJ products and to exploit all rights, as set out in our [licence](#).

The Submitting Author accepts and understands that any supply made under these terms is made by BMJ to the Submitting Author unless you are acting as an employee on behalf of your employer or a postgraduate student of an affiliated institution which is paying any applicable article publishing charge ("APC") for Open Access articles. Where the Submitting Author wishes to make the Work available on an Open Access basis (and intends to pay the relevant APC), the terms of reuse of such Open Access shall be governed by a Creative Commons licence – details of these licences and which [Creative Commons](#) licence will apply to this Work are set out in our licence referred to above.

Other than as permitted in any relevant BMJ Author's Self Archiving Policies, I confirm this Work has not been accepted for publication elsewhere, is not being considered for publication elsewhere and does not duplicate material already published. I confirm all authors consent to publication of this Work and authorise the granting of this licence.

1  
2  
3  
4 1 **Patient-reported experiences with general practitioners: a**  
5 2 **randomized study of mail and web-based approaches**  
6 3 **following a national survey**  
7  
8  
9  
10  
11  
12  
13

14 8 **Authors:**

15  
16 9 Hilde Hestad Iversen<sup>1</sup> ([hilde.hestad.iversen@fhi.no](mailto:hilde.hestad.iversen@fhi.no)) +47 46400425) (Corresponding author)

17  
18  
19 10 Olaf Holmboe<sup>1</sup> ([olaf.holmboe@fhi.no](mailto:olaf.holmboe@fhi.no))

20  
21 11 Oyvind Bjertnaes<sup>1</sup> ([oyvindandresen.bjertnaes@fhi.no](mailto:oyvindandresen.bjertnaes@fhi.no))  
22  
23  
24  
25  
26  
27  
28  
29

30 13 **Affiliations:**

31 14 <sup>1</sup>Division of Health Services, Norwegian Institute of Public Health, PO Box 4404 Nydalen,  
32 15 0403 Oslo, Norway  
33  
34  
35  
36  
37  
38  
39  
40  
41  
42  
43  
44  
45  
46  
47

48 22 **Keywords:** data collection, general practitioners, patient satisfaction, physicians, random  
49 23 allocation, surveys and questionnaires  
50  
51  
52  
53

54 24 **Word count:** 3,854  
55  
56  
57  
58  
59  
60 26

## 1 **Abstract**

### 2 **Objective**

3 The standard data-collection procedure in the national patient experience survey programme  
4 in Norway is post-discharge mail surveys, which include a pen-and-paper questionnaire and  
5 an option to answer electronically. A purely electronic protocol has not previously been  
6 explored, and the aim of this study was to compare response rates, background characteristics,  
7 data quality and main study results for a survey of patient experiences with general  
8 practitioners (GPs) administered by the standard mail data-collection procedure and a web-  
9 based approach.

### 10 **Design**

11 Cross-sectional survey.

### 12 **Setting**

13 In Norway every inhabitant is assigned to an individual GP, and the setting for the current  
14 survey is patients of GPs. Regular GP practices were randomly selected after stratification by  
15 the number of GPs at the practices and the municipality types.

### 16 **Participants**

17 The sample consisted of 6,999 patients aged 16 years and older registered with a GP in  
18 November 2018.

### 19 **Intervention**

20 Based on a three-stage sampling design, 6,999 patients of GPs aged 16 or older were  
21 randomized to one of two survey administration protocols: Group A, who were mailed an  
22 invitation with both a pen-and-paper and electronic response option ( $n=4,999$ ) and Group B,  
23 who received an email invitation with electronic response option ( $n=2,000$ ).



1  
2  
3 1 **Main outcome measures**  
4

5 2 Response rates, background characteristics, data quality and main study results.  
6  
7

8  
9 3 **Results**

10 4 The response rate was markedly higher for the mail survey (42.6%) than for the web-based  
11  
12 5 survey (18.3%). A few of the background variables differed significantly between the two  
13  
14 6 groups, but the data quality and patient-reported experiences were similar.  
15  
16  
17

18  
19 7 **Conclusions**

20  
21 8 Web-based surveys are faster and less expensive than standard mail surveys, but their low  
22  
23 9 response rates and coverage problems threaten their usefulness and legitimacy. Initiatives to  
24  
25 10 increase response rates for web-based data collection, more non-response research and  
26  
27 11 strategies for tailoring data collection to different groups should be key elements in future  
28  
29 12 research.  
30  
31  
32

33 13  
34  
35  
36  
37  
38  
39  
40  
41  
42  
43  
44  
45  
46  
47  
48  
49  
50  
51  
52  
53  
54  
55  
56  
57  
58  
59  
60

## 1 Article Summary

### 2 Strengths and Limitations

- 3 • The establishment of a national register with electronic contact information opens up  
4 new possibilities regarding electronic and web-based surveys
- 5 • A purely electronic protocol has not previously been explored in the national program  
6 for monitoring and reporting on health-care quality using patient experience surveys in  
7 Norway
- 8 • The results should be applicable to health systems with similar infrastructures and  
9 digital maturities, and also to countries working to establish regional or national  
10 digital infrastructures
- 11 • Future research needs to focus on initiatives for increasing response rates in web-based  
12 protocols, including sending multiple reminders using a combination of emails,  
13 messages on mobile phones, and other available platforms
- 14 • This study included adults evaluating their GPs, and so the results might not be  
15 generalizable to other health-care settings

## 1 Introduction

2 Norway introduced the regular General Practitioner (GP) scheme in 2001. All inhabitants who  
3 are registered in the National Registry as living in Norway have the right to a GP/family  
4 doctor. Migrants eligible to stay in Norway for more than six months are entitled to enrol in  
5 the scheme. GPs in Norway play a key role in the provision of health care, and are often the  
6 first contact point of patients with health services for most medical problems.<sup>1</sup> In 2018, The  
7 Ministry of Health and Care Services decided to evaluate the GP scheme, and part of this  
8 evaluation comprised a national patient experience survey.

9  
10 The Norwegian Institute of Public Health (NIPH) is responsible for performing national  
11 patient experience surveys in Norway. Norway has a national program for monitoring and  
12 reporting on the quality of health care using patient experience surveys. The purpose of this  
13 program is to measure user experiences with health care systematically, with the obtained data  
14 used as a basis for interventions aimed at improving the quality of health care, health-care  
15 management, patient choice, and public accountability. The standard data-collection  
16 procedure in the national surveys is post-discharge mail surveys, which include a pen-and-  
17 paper questionnaire and an option to answer electronically.

18  
19 The results from previous studies of survey-mode preferences in different patient populations  
20 both in Norway and other countries indicate that there is a rather modestly developed web-  
21 mode preference.<sup>2-11</sup> In the national patient experience survey among patients visiting general  
22 practitioners in 2014 in Norway, only 18% of respondents answered electronically.<sup>4</sup>

1  
2  
3 1 A main limitation of previous studies has been the lack of e-mail addresses in the sample  
4  
5 2 frame, and the implication that even the electronic group had to be invited by a postal  
6  
7 3 invitation, adding to costs, and precluding the possibility of testing a comprehensive  
8  
9 4 electronic data collection option. A purely electronic protocol has not previously been  
10  
11 5 explored in the national program for monitoring and reporting on health-care quality using  
12  
13 6 patient experience surveys in Norway.  
14  
15  
16  
17  
18

19 8 The literature on the effects of background characteristics on the responses to different data  
20  
21 9 collection methods are inconsistent.<sup>2-10</sup> Non-response bias has been studied in four patient  
22  
23 10 populations in Norway through follow-up telephone interviews with non-respondents,<sup>12-15</sup>  
24  
25 11 including non-respondents in a survey on patient experiences with GPs<sup>15</sup> The results have  
26  
27 12 shown minor differences between the postal respondents from the national surveys and the  
28  
29 13 postal non-respondents who have provided answers through follow-up interviews. In general,  
30  
31 14 the impact of non-response bias in the large-scale surveys have been considered relatively  
32  
33 15 small.  
34  
35  
36  
37  
38  
39

40 17 The use of Internet in the population is growing. In 2018, 90% of all Norwegian citizens used  
41  
42 18 the Internet at a daily basis.<sup>16</sup> In all age groups under 60 years, between 90-99 percent  
43  
44 19 reported to use the Internet daily, but corresponding results for those between 60-69 years was  
45  
46 20 81% and for those aged 70 years or more 67%. Seventeen percent of the citizens aged 70  
47  
48 21 years or more reported that they never used the Internet. In Norway, the establishment of a  
49  
50 22 national register with electronic contact information opens new possibilities regarding  
51  
52 23 electronic and Hilde -based surveys. A total of 88% of the population was registered in the  
53  
54 24 national register for contact information in November 2018.<sup>17</sup> So far, this register has not been  
55  
56 25 exploited in our national patient experience surveys.  
57  
58  
59  
60

1  
2  
3 1  
4  
5 2 Potential variations in the population coverage between paper- and web-based questionnaires  
6  
7 3 and the risk of selection bias from using the Internet for questionnaire surveys are reduced,  
8  
9  
10 4 but a major concern with protocols that use only digital responses is leaving out people  
11  
12 5 without available digital contact information. When comparing the standard mail survey mode  
13  
14 6 of data collection with web-based data collection the characteristics of non-respondents and  
15  
16 7 respondents in both groups should be explored.  
17  
18  
19 8

20  
21 9 The potential advantages of lower costs and shorter data-collection times are important  
22  
23 10 arguments for performing further research into web-based surveys. Also, the expansion of  
24  
25 11 Internet access and use may have changed the potential of the Internet to be an effective way  
26  
27 12 to conduct such surveys. We considered these potential advantages and possibilities as  
28  
29 13 important arguments for performing further research into web-based surveys.  
30  
31  
32  
33 14

34  
35 15 The aim of the current study was to compare the standard mail survey mode of data collection  
36  
37 16 with web-based data collection in Norway. The sample was randomized to one of two survey  
38  
39 17 administration protocols: patients in Group A were mailed an invitation with both pen-and-  
40  
41 18 paper and electronic response options, while those in Group B received an email invitation  
42  
43 19 with an electronic response option only (using email addresses obtained from the national  
44  
45 20 register). The response rates, data quality, background characteristics, and main study results  
46  
47 21 were compared between the two groups.  
48  
49  
50  
51 22

52  
53  
54 23  
55  
56  
57  
58  
59  
60

## 1 **Methods**

### 2 **Data**

3 The sample consisted of patients aged 16 years and older registered with a GP in November  
4 2018. The preconditions for the sampling frame were to report the results on a national level  
5 and to be able to estimate intraclass correlation coefficients on the GP practice level. We did  
6 not aim to benchmark at the GP level. With the patient sample size chosen, we explored how  
7 the ICC varied dependent on the number of GPs at the practice level and found that at least  
8 four GPs were needed per GP practice to reach an acceptable ICC, and that not much were  
9 gained by including more GPs per practice. The sampling plan had a three-stage design. First,  
10 regular GP practices were randomly selected after stratification by the number of GPs at the  
11 practices and the municipality types. Second, all the GPs were included in the selected  
12 practices that had up to four GPs, while four of them were randomly selected in the practices  
13 that had five or more GPs. Third, we randomly selected 14 adult patients from the list of  
14 patients of each GP.

15  
16 This study included a total of 6,999 patients. Patients were randomized to 1 of 2 survey  
17 administration protocols: 4,999 patients to the main sample (Group A) and 2,000 patients to a  
18 subsample (Group B) (Fig. 1). The current study was the first to explore a purely electronic  
19 protocol in the national program of patient experience surveys in Norway. Also, we have not  
20 previously explored the quality of the email addresses collected from the national register for  
21 contact information. Considering the commission of achieving national representative results  
22 and the uncertainty regarding the responses from a purely electronic protocol, we evaluated  
23 the risk of randomizing the total sample in two groups as too high and chose to include fewer  
24 patients in the subsample.

1 Patients in Group A were mailed an invitation with both pen-and-paper and electronic  
2 response options. The invitation included a cover letter describing the purpose of the study, a  
3 paper questionnaire, a prepaid envelope and information and a login code to be able to  
4 respond electronically. The patients in Group B received an email invitation with an  
5 electronic response option only. The email invitation included information about the purpose  
6 of the study, a link to the online survey and a login code. Two reminders were sent to non-  
7 respondents in both samples using the same contact mode as for the first invitation. The first  
8 reminder was sent to both groups around three weeks after the first contact. The second  
9 reminder was sent around six weeks after the first contact. All reminders to Group A were  
10 sent by mail and included a new invitation, the paper questionnaire, the postage-paid envelope  
11 and the login code to enable electronic responses. Group B were sent a new email invitation  
12 with a link to the survey and a login code in both reminders.

13  
14 Background data about the patients were obtained from public registries, including on gender,  
15 age, the number of years on the patient list of a GP, and the number of consultations during  
16 the past 24 months. Email addresses were collected from the national register for contact  
17 information, which is operated by the Agency for Public Management and eGovernment.

## 18 19 **Measures**

20 The Norwegian PEQ-GP (Patient Experiences with General Practitioner Questionnaire) was  
21 applied. This instrument was developed and validated according to the standard scientific  
22 procedures of the national patient-reported experience program in Norway.<sup>5,10</sup>

23  
24 A national validation study identified five scales that covered important aspects of the GP  
25 service relating to accessibility, evaluations of the GP and auxiliary staff, cooperation

1  
2  
3 1 between the GP and other services, and patient enablement. We included 17 additional items  
4  
5 2 that were relevant for evaluating the GP scheme. The questionnaire used in the randomized  
6  
7 3 study consisted of 47 questions on 6 pages. Thirty-seven questions addressed experiences  
8  
9 4 with the GP service, while ten were background questions. Most of the questions related to  
10  
11 5 the user-reported experiences were answered in a 5-point response format ranging from “not  
12  
13 6 at all” to “to a very large degree. Single item and index scores were transformed linearly from  
14  
15 7 the 1 to 5 scale to a scale of 0–100. An additional page was included to allow the respondents  
16  
17 8 to write comments relating to experiences with their GPs and wishes regarding future changes  
18  
19 9 to the GP scheme.  
20  
21  
22  
23  
24  
25  
26

### 27 **Patient and Public Involvement**

28  
29 12 Patients were included in the development process of the instrument, to secure that the  
30  
31 13 questionnaire included the most important topics for patients. To identify important topics, we  
32  
33 14 assessed reviews of the literature and consulted a reference group comprising GPs,  
34  
35 15 researchers and representatives from health authorities and patient organisations throughout  
36  
37 16 the process of questionnaire development. The questionnaire was tested through cognitive  
38  
39 17 interviews with patients. First, eight face-to-face interviews and nine telephone interviews  
40  
41 18 were conducted. After an extensive revision, we conducted another 11 face-to-face interviews  
42  
43 19 with patients. The revised version was tested in a pilot study.  
44  
45  
46  
47  
48  
49  
50

### 51 **Statistical analysis**

52  
53 22 The survey response rate by group was calculated as the proportion of eligible patients (ie, not  
54  
55 23 those who had moved to a new house, died, or were otherwise ineligible) and who returned a  
56  
57 24 completed survey (AAPOR response rate 4.0).<sup>18</sup>  
58  
59  
60



1  
2  
3 1 Items were assessed for levels of missing data, ceiling effects, and internal consistency. The  
4  
5 2 internal consistency reliability of the five scales was assessed using the item-total correlation  
6  
7 3 and Cronbach's alpha. The item-total correlation coefficient quantifies the strength of an  
8  
9 4 association between an item and the remainder of its indicator, with a coefficient of 0.4  
10  
11 5 considered acceptable.<sup>19</sup> Cronbach's alpha assesses the overall correlation between items  
12  
13 6 within an indicator, and an alpha value of 0.7 is considered satisfactory.<sup>19,20</sup> We set the cut-off  
14  
15 7 criterion for ceiling effects to 50%; that is, an item was considered acceptable if fewer than  
16  
17 8 50% of the respondents chose the most-favourable response option.<sup>21,22</sup>  
18  
19  
20  
21  
22  
23

24 10 Differences in respondent characteristics between Group A and Group B were tested using  
25  
26 11 Pearson chi-square tests for categorical variables and independent-samples *t*-tests for  
27  
28 12 continuous variables. Differences between the two groups regarding patient-reported  
29  
30 13 experiences were tested using *t*-tests.  
31  
32  
33  
34

35 15 Differences in respondent characteristics between respondents and non-respondents in Group  
36  
37 16 A and respondents and non-respondents in Group B were tested using Pearson chi-square  
38  
39 17 tests for categorical variables and independent-samples *t*-tests for continuous variables.  
40  
41  
42 18 Variables available on non-respondents were gender, age, time on the list of the GP, number  
43  
44 19 of consultations during the past 24 months and number of diagnosis during the past 24  
45  
46 20 months.  
47  
48  
49  
50

51 22 All the statistical analyses were performed using SPSS (version 25.0).  
52  
53  
54  
55  
56  
57  
58  
59  
60

## 1 **Approval**

2 The Data Protection Officer at the NIPH recommended that the study be approved, and it was  
3 formally approved by the research director of the division for health services at the NIPH. The  
4 Norwegian Directorate of Health approved the use of data about non-respondents in the  
5 nonresponse analysis, except those of patients who withdrew themselves from the study.  
6 Return of the questionnaire represented patient consent in the study, which is the standard  
7 procedure in all patient experience surveys conducted by the Norwegian Institute of Public  
8 Health.

## 10 **Results**

11 The overall response rate was 42.6% in Group A and 18.3% in Group B (Table 1). 15% of the  
12 patients in the electronic arm lacked a valid email address in the national register, and 5% of  
13 the patients in the standard mail survey mode lacked a valid mailing address (Fig. 1). Most of  
14 the respondents (70.9%) in Group A answered on paper (Table 1). The initial response rate  
15 was around 10% lower for Group B than for group A, with the remaining difference being  
16 related to reduced effects of both the first and second reminders.

18 The levels of missing data, proportion of responses in the “not applicable” option, ceiling  
19 effects, and internal consistency for the items are presented in Table 2. The levels of missing  
20 data ranged from 1.6% to 18.7% in Group A, and from 0.0% to 17.1% in Group B. The  
21 proportions of responses in the “not applicable” category ranged from 3.0% to 29.4% in  
22 Group A, and from 1.6% to 31.9% in Group B, and were higher in Group A than in Group B  
23 for all items except for two on the enablement scale and the items on the coordination and  
24 cooperation scale. All scales and items were below the ceiling-effect criterion of 50% in

1  
2  
3 1 Group A, but two items exceed the criterion in Group B: one about whether the GP takes the  
4  
5 2 patient seriously (52.2%) and the other about whether the GP communicates in a way that the  
6  
7 3 patient can understand (56.0%). Cronbach's alpha values were similar in the two groups for  
8  
9 4 four of the five indicators, but was lower (and below the criterion of 0.7) for the accessibility  
10  
11 5 indicator in Group B. The remaining Cronbach's alpha values were above 0.7.  
12  
13  
14  
15  
16

17 7 Table 3 compares the background characteristics of the respondents in the two survey  
18  
19 8 administration protocols. The respondent age, time since previous contact, and education level  
20  
21 9 differed significantly between the two groups, whereas there were no significant differences  
22  
23 10 in gender, number of years on the list of the GP, number of consultations, number of  
24  
25 11 diagnosis codes during the past 24 months, number of unique diagnosis codes the past 24  
26  
27 12 months, self-perceived physical health, self-perceived mental health, long-standing health  
28  
29 13 problems, or geographic origin. The proportion of patients aged 30–49 years was higher in  
30  
31 14 Group B than in Group A (37.4% compared to 23.8%). In group A, 31.8% of the patients  
32  
33 15 were aged  $\geq 67$  years, a much higher proportion than in group B where the corresponding  
34  
35 16 proportion was 19.4%. The respondents in Group B were more likely to report that they had  
36  
37 17 been in contact with their GP during the previous month than respondents in Group A. There  
38  
39 18 was a significant tendency for those who responded to the email invitation to have a higher  
40  
41 19 education level than those who responded to the mailed invitation: 61.5% of those in Group B  
42  
43 20 reported being educated to the university level, compared to 47.0% in Group A.  
44  
45  
46  
47  
48  
49

50  
51 21  
52 22 Significant differences were found between Group A and Group B within respondents and  
53  
54 23 non-respondents with respect to gender and age (Table 4). Non-respondents tended to be more  
55  
56 24 likely to be men and to be younger than respondents in both groups. Significant differences  
57  
58 25 were also found for time on the list of the GP, number of consultations during the past 24  
59  
60

1 months and the two variables about number of diagnosis the last two years for Group A.  
2  
3 Respondents tended to have been longer on the GPs list, and to have a higher number of  
4  
5 consultations and diagnosis during the last two years. We found no additional differences  
6  
7  
8 between respondents and non-respondents in Group B.  
9  
10

11  
12  
13  
14 Differences in patient-reported experiences between the two groups were small, varying from  
15  
16 only 0.3 (GP is competent) to 3.5 (waiting time for appointments that are not urgent is  
17  
18 acceptable) on a scale from 0 to 100 (Table 5). There were no significant differences in the 5  
19  
20 indicators between the 2 groups, and only 1 of the 24 items was significantly different: the  
21  
22 score for the item about the helpfulness and competence of other employees at GP practices  
23  
24 was significantly higher in Group A than in Group B ( $p=0.046$ ).  
25  
26  
27  
28  
29  
30  
31

## 32 Discussion

33  
34  
35 This study compared response rates, background characteristics, data quality, and main study  
36  
37 results between two randomized data-collection groups in a national survey of patient  
38  
39 experiences with GPs. Patients in Group A were mailed an invitation with both pen-and-paper  
40  
41 and electronic response options, while those in Group B received an email invitation with an  
42  
43 electronic response option only. The response rate was 2.3-fold higher for the mail protocol  
44  
45 than for the web-based protocol, but the patient-reported experiences were similar in the two  
46  
47  
48 groups.  
49  
50

51  
52  
53 The current study of patient experiences with GPs is the first to explore a purely electronic  
54  
55 protocol in the national program for monitoring and reporting on health-care quality using  
56  
57 patient experience surveys in Norway. Web-based surveys have many advantages, including  
58  
59  
60

1  
2  
3 1 direct links to survey sites, ease of distribution, ease of receiving responses, and lower costs,  
4  
5 2 but a major concern is that they exclude people without an email address as well as those with  
6  
7 3 poor access to the Internet. The existence of a national register in Norway with electronic  
8  
9 4 contact information presents a major opportunity for large-scale surveys of patient  
10  
11 5 experiences. The vast majority of the Norwegian population is included in the national  
12  
13 6 register and uses the Internet at a daily basis, reducing potential variations in the population  
14  
15 7 coverage between paper- and web-based questionnaires and the risk of selection bias from  
16  
17 8 using the Internet for questionnaire surveys. However, as many as 15% of the patients in the  
18  
19 9 electronic arm lacked a valid email address in the national register, the corresponding number  
20  
21 10 we could not reach in the standard mail data-collection was 5%. Furthermore, only 18% of the  
22  
23 11 contacted sample in the web-based approach responded.  
24  
25  
26  
27  
28  
29  
30

31 13 The results are consistent with literature reports that mail surveys achieve higher response  
32  
33 14 rates than electronic and web-based approaches.<sup>2-11</sup> A recent Consumer Assessment of  
34  
35 15 Healthcare Providers and Systems (CAHPS) survey produced corresponding results when  
36  
37 16 comparing protocols based on web responses via an email invitation and mail.<sup>7</sup> The mail  
38  
39 17 protocol yielded more than twice the response rate of the web approach. A study of patient  
40  
41 18 experiences with individual physicians showed that response rates were higher by mail (51%)  
42  
43 19 than web (15%).<sup>9</sup> In a study of patient experiences with outpatient clinics 14% responded to  
44  
45 20 the web-based survey and 33% responded to the mail survey.<sup>8</sup> When considering the  
46  
47 21 completeness of the responses, our results are in line previous studies we found that the web-  
48  
49 22 based questionnaire had fewer missing values than the mail protocol. The levels of ceiling  
50  
51 23 effects and internal consistency were similar in the two groups.  
52  
53  
54  
55  
56  
57  
58  
59  
60

1  
2  
3 1 Despite the marked differences in response rates, the results showed minor differences in the  
4  
5 2 level of patient reported experiences between the standard mail data-collection procedure and  
6  
7 3 a web-based approach. There were no significant differences in the 5 indicators between the 2  
8  
9 4 groups, and only one single item score was significantly different between the two groups.  
10  
11 5 These results are in line with other findings.<sup>2,3,7,8,9</sup> There might be several reasons for the high  
12  
13 6 correlation between the response modes. The surveys were designed to be as similar as  
14  
15 7 possible, including the invitation letter, the content, layout and structure of the questionnaire  
16  
17 8 and the timing of the first contact and reminders. The invitations to the patients in Group A  
18  
19 9 and Group B were sent the same week and non-respondents in both groups received two  
20  
21 10 reminders.  
22  
23  
24  
25  
26  
27  
28  
29  
30  
31  
32  
33  
34  
35  
36  
37  
38  
39  
40  
41  
42  
43  
44  
45  
46  
47  
48  
49  
50  
51  
52  
53  
54  
55  
56  
57  
58  
59  
60

12 The response rate alone is a poor predictor of nonresponse bias, and previous studies have  
13 failed to find a consistent association between response rates and sample  
14 representativeness.<sup>23,24</sup> However, low response rates threaten the legitimacy of surveys in both  
15 the clinical and public domains, and reduce the ability of surveys to identify important  
16 differences in patient-reported experiences between providers and over time.<sup>2,3</sup> Future  
17 research needs to focus on effective initiatives for increasing response rates in web-based  
18 protocols, including sending multiple reminders using a combination of emails, messages on  
19 mobile phones, and other available platforms. For example, the national infrastructure in  
20 Norway provides the possibility for secure digital mailboxes for all Norwegian inhabitants,  
21 which could be utilized for contacting digitally active patients.

23 The current study showed that a lower education level and higher age were associated with a  
24 mail preference. In the current study we found that respondents invited by email were  
25 younger, more educated, and more likely to have had more-recent contact with their GP. We

1 found no significant intergroup differences in the remaining nine background variables. There  
2 are several methods for assessing non-response bias, including comparison of respondents and  
3 non-respondents on background variables.<sup>25</sup> When we compared respondents with non-  
4 respondents, we found that men and younger patients were underrepresented as respondents  
5 in both groups. These differences are normally handled by non-response weighting, but such  
6 weights are only able to compensate for variables available in the sampling frame. We did not  
7 conduct further analysis of non-respondents, but previous follow-up studies of non-  
8 respondents in Norway indicate small additional bias.<sup>12-15</sup> However, none of these have  
9 included a purely digital protocol, which warrant future non-response research for digital  
10 protocols. The coverage challenges for the digital sampling frame should be part of this  
11 research, as 12% of the population was not registered in the register, and 15% of the  
12 registered persons lacked a valid email address. This coverage challenge is an additional  
13 weakness of purely digital approaches and should be compensated with other response  
14 options for those excluded.

15  
16 The effects of background characteristics reported in the literature are inconsistent.<sup>2-10</sup> The  
17 results from two previous randomized studies showed similar background characteristics for  
18 respondents in different randomized groups.<sup>2,3</sup> However, the respondents in those surveys  
19 were all contacted by mail. Future research should assess how the national infrastructure in  
20 Norway could be used to tailor the mode of data collection to different groups, such as by  
21 providing a range of data-collection modes from purely electronic strategies (for respondents  
22 with high education levels) to a mail-based mixed mode (to older respondents and those with  
23 low education levels).

24

1  
2  
3 1 Combined with the low response rates achieved for web-based protocols in this and other  
4  
5 2 studies, future representative and high-quality surveys should include the opportunity to  
6  
7 3 answer on pen-and-paper questionnaires. This could be implemented in a mixed-mode design  
8  
9 4 that provides respondents with the option to choose how they want to respond, making it  
10  
11 5 possible for patients without Internet access or enough computer skills to also participate.  
12  
13  
14  
15 6

16  
17 7 A limitation of this study is that it only included adults evaluating their GPs in Norway, and  
18  
19 8 so the results might not be generalizable to other health-care settings and countries. In  
20  
21 9 particular, the national infrastructure and the digital maturity of the population in Norway  
22  
23 10 might differ from the characteristics of other countries. However, the results should be  
24  
25 11 applicable to health systems with similar infrastructures and digital maturities, and to  
26  
27 12 countries working to establish regional or national digital infrastructures.  
28  
29  
30  
31 13

## 32 33 34 14 **Conclusions**

35  
36  
37 15 Administering a survey of patient experiences with GPs using a web-based protocol produced  
38  
39 16 results that were very similar to those obtained using the standard mail-mode data-collection  
40  
41 17 procedure that is used in the national surveys but had a much lower response rate.  
42  
43 18 Furthermore, respondents in the digital group were younger, more educated, and had more-  
44  
45 19 recent experiences with their GPs. Men and younger patients were underrepresented as  
46  
47 20 respondents in both groups. Web-based surveys are faster and cheaper than standard mail  
48  
49 21 surveys, but their low response rates threaten their legitimacy. Initiatives to increase response  
50  
51 22 rates for web-based data collection and strategies for tailoring data collection to different  
52  
53 23 groups should be key elements in future research.  
54  
55  
56  
57  
58 24  
59  
60



## **Funding**

This research received grant from the Norwegian Ministry of Health and Care Services.

## **Competing interests**

On behalf of all authors, the corresponding author states that there are no competing interests.

## **Author contributions**

The Ministry of Health and Care Services initiated the study. H.H.I. planned the study in consultation with O.B. and O.H. H.H.I. performed the statistical analyses with O.B. and O.H. and drafted the manuscript. O.B. and O.H. participated in the planning process, critically revised the manuscript draft and approved the final version of the manuscript. H.H.I. was the project manager for the survey. All authors read and approved the final manuscript.

## **Acknowledgements**

We thank Inger Opedal Paulsrud from the NIPH for her help in conducting the survey, including performing administrative and technical tasks for the data collection. We would also like to thank Sylvia Drange Sletten, Marius Troøyen and Sindre Møgster Braaten from the NIPH for help developing the system for web-based data collection.

## **Availability of data and material**

The data set generated and/or analysed during this study is not publicly available due to the need to protect personal data.

## References

1. Eide TB, Straand J, Rosvold EO. Patients' and GPs' expectations regarding healthcare-seeking behaviour: a Norwegian comparative study. *BJGP Open*. 2018;2(4):bjgpopen18X101615.
2. Bjertnaes OA, Iversen HH. User-experience surveys with maternity services: a randomized comparison of two data collection models. *Int J Qual Health Care*. 2012;24(4):433–8.
3. Bjertnaes O, Iversen HH, Skrivarhaug T. A randomized comparison of three data collection models for the measurement of parent experiences with diabetes outpatient care. *BMC Med Res Methodol*. 2018;18 (1):95.
4. Holmboe O, Bjertnæs OA. Patient experiences with Norwegian hospitals in 2015. Results following a national survey. Oslo: Norwegian Knowledge Centre for the Health Services, PasOpp-report 147; 2016. ISSN 1890-1565.
5. Holmboe O, Danielsen K, Iversen HH. Development of a method for the measurement of patient experiences with regular general practitioners. Oslo: Norwegian Knowledge Centre for the Health Services, PasOpp-report 1; 2015. ISSN 1890-1565.
6. Danielsen K, Holmboe O, Hansen SL, Førland O, Bjertnæs OA. Patient experiences with Norwegian primary care out-of-hours clinics. Oslo: Results from a survey among the “Vakttårn” clinics. Norwegian Knowledge Centre for the Health Services, PasOpp-report 1; 2012. ISSN 1890-1565.
7. Fowler FJ Jr, Cosenza C, Cripps LA, Edgman-Levitan S, Cleary PD. The effect of administration mode on CAHPS survey response rates and results: a comparison of mail and web-based approaches. *Health Serv Res*. 2019;54(3):714–21.
8. Bergeson SC, Gray J, Ehrmantraut LA, Laibson T, Hays RD. Comparing web-based with mail survey administration of the Consumer Assessment of Healthcare Providers

- 1  
2  
3 1 and Systems (CAHPS(®)) Clinician and Group survey. *Prim Health Care*.  
4  
5 2 2013;3:1000132.  
6  
7  
8 3 9. Rodriguez HP, von Glahn T, Rogers WH, Chang H, Fanjiang G, Safran DG.  
9  
10 4 Evaluating patients' experiences with individual physicians: a randomized trial of  
11  
12 5 mail, internet, and interactive voice response telephone administration of surveys.  
13  
14 6 *Med Care*. 2006;44(2):167–74.  
15  
16  
17 7 10. Holmboe O, Iversen HH, Danielsen K, Bjertnaes O. The Norwegian patient  
18  
19 8 experiences with GP questionnaire (PEQ-GP): reliability and construct validity  
20  
21 9 following a national survey. *BMJ Open*. 2017;7(9):e016644.  
22  
23  
24 10 11. Iversen HH, Bjertnaes O, Helland Y, Skrivarhaug T. The Adolescent Patient  
25  
26 11 Experiences of Diabetes Care Questionnaire (APEQ-DC): Reliability and Validity in a  
27  
28 12 Study Based on Data from the Norwegian Childhood Diabetes Registry. *Patient Relat*  
29  
30 13 *Outcome Meas*. 2019;10:405-16.  
31  
32  
33 14 12. Guldvog B, Hofoss D, Pettersen KI, Ebbesen J, Ronning OM: PS-RESKVA -  
34  
35 15 pasienttilfredshet i sykehus [PS-RESKVA -patient satisfaction in hospitals]. *Tidsskr*  
36  
37 16 *Nor Laegeforen*. 1998, 118: 386-391.  
38  
39  
40 17 13. Dahle KA, Iversen H, Sjetne IS, Oltedal S: Do non-respondents' characteristics and  
41  
42 18 experiences differ from those of respondents? Poster at the the 25th International  
43  
44 19 Conference by the Society for Quality in Health Care (ISQua). 2008, Copenhagen.  
45  
46  
47 20 14. Iversen H, Dahle KA, Holmboe O: Using telephone interviews to explore potential  
48  
49 21 non-response bias in a national postal survey. Poster at the the 26th International  
50  
51 22 Conference by the Society for Quality in Health Care (ISQua). 2009, Dublin.  
52  
53  
54 23 15. Danielsen K, Iversen H, Holmboe O. Telephone interviews to assess non-response  
55  
56 24 bias in a postal user experience survey: Kirsten Danielsen. *European Journal of Public*  
57  
58 25 *Health*. 2015;25(suppl\_3).  
59  
60

- 1  
2  
3 1 16. Kompetanse Norge. Befolkningens bruk av digitale verktøy. Available from:  
4  
5 2 [https://www.kompetansenorge.no/statistikk-og-analyse/grunnleggende-digital-](https://www.kompetansenorge.no/statistikk-og-analyse/grunnleggende-digital-ferdigheter/befolkningens-bruk-av-digitale-verktoy/#)  
6  
7 [ferdigheter/befolkningens-bruk-av-digitale-verktoy/#](https://www.kompetansenorge.no/statistikk-og-analyse/grunnleggende-digital-ferdigheter/befolkningens-bruk-av-digitale-verktoy/#) [Accessed 10 June 2020].  
8  
9  
10 4 17. Digitaliseringsdirektoratet. Befolkningens bruk av digitale verktøy. Kontakt- og  
11  
12 5 reservasjonsregisteret. Available from: [https://samarbeid.difi.no/statistikk/kontakt-og-](https://samarbeid.difi.no/statistikk/kontakt-og-reservasjonsregisteret)  
13  
14 6 [reservasjonsregisteret](https://samarbeid.difi.no/statistikk/kontakt-og-reservasjonsregisteret) [Accessed 10 June 2020].  
15  
16  
17 7 18. The American Association for Public Opinion Research. 2016. Standard Definitions:  
18  
19 8 Final Dispositions of Case Codes and Outcome Rates for Surveys. 9th edition.  
20  
21 9 AAPOR. [https://www.aapor.org/Standards-Ethics/Standard-Definitions-\(1\).aspx](https://www.aapor.org/Standards-Ethics/Standard-Definitions-(1).aspx).  
22  
23 [Accessed 10 June 2020].  
24  
25  
26 11 19. Nunnally JC, Bernstein IH. Psychometric Theory. 3rd edn. New York: McGraw-Hill;  
27  
28 12 1994.  
29  
30  
31 13 20. Kline RB. Principles and Practice of Structural Equation Modeling. New York:  
32  
33 14 Guildford; 2005.  
34  
35  
36 15 21. Bjertnaes OA, Lyngstad I, Malterud K, Garratt A. The Norwegian EUROPEP  
37  
38 16 questionnaire for patient evaluation of general practice: data quality, reliability and  
39  
40 17 construct validity. *Fam Pract*. 2011;28(3):342–9.  
41  
42  
43 18 22. Ruiz MA, Pardo A, Rejas J, Soto J, Villasante F, Aranguren JL. Development and  
44  
45 19 validation of the “Treatment Satisfaction with Medicines Questionnaire” (SATMED-  
46  
47 20 Q). *Value Health*. 2008;11(5):913–26.  
48  
49  
50 21 23. Groves RM, Peytcheva E. The impact of nonresponse rates on nonresponse bias: a  
51  
52 22 meta-analysis. *Public Opin Q*. 2008;72(2):167–89.  
53  
54  
55 23 24. Groves RM. Nonresponse rates and nonresponse bias in household surveys. *Public*  
56  
57 24 *Opin Q*. 2006;70(5):646–75.  
58  
59  
60

- 1  
2  
3 1 25. Halbesleben JRB, Whitman MV. Evaluating Survey Quality in Health Services  
4  
5 2 Research: A Decision Framework for Assessing Nonresponse Bias. Health Services  
6  
7 3 Research. 2013;48(3):913-30.  
8  
9  
10  
11  
12  
13  
14  
15  
16  
17  
18  
19  
20  
21  
22  
23  
24  
25  
26  
27  
28  
29  
30  
31  
32  
33  
34  
35  
36  
37  
38  
39  
40  
41  
42  
43  
44  
45  
46  
47  
48  
49  
50  
51  
52  
53  
54  
55  
56  
57  
58  
59  
60

For peer review only

1  
2  
3  
4  
5  
6  
7  
8  
9  
10  
11  
12  
13  
14  
15  
16  
17  
18  
19  
20  
21  
22  
23  
24  
25  
26  
27  
28  
29  
30  
31  
32  
33  
34  
35  
36  
37  
38  
39  
40  
41  
42  
43  
44  
45  
46  
47  
48  
49  
50  
51  
52  
53  
54  
55  
56  
57  
58  
59  
60

1 **Figure 1:** CONSORT flow diagram

For peer review only

1 **Table 1:** Respondents before and after each reminder in the two randomized groups, and final response rates.

|                                           | Group A (n=4,760) | Group B (n=1,694) |
|-------------------------------------------|-------------------|-------------------|
| <i>Respondents before reminder:</i>       |                   |                   |
| Electronic, n                             | 272               | 117               |
| Paper, n                                  | 560               | -                 |
| Response rate, %                          | 17.5              | 6.9               |
| <i>Respondents after first reminder:</i>  |                   |                   |
| Electronic, n                             | 171               | 126               |
| Paper, n                                  | 533               | -                 |
| Increase in response rate, %              | 14.8              | 7.4               |
| <i>Respondents after second reminder:</i> |                   |                   |
| Electronic, n                             | 148               | 67                |
| Paper, n                                  | 345               | -                 |
| Increase in response rate, %              | 10.4              | 4.0               |
| <i>Total:</i>                             |                   |                   |
| Electronic, n (%)                         | 591 (29.1)        | 310               |
| Paper, n (%)                              | 1438 (70.9)       |                   |
| Response rate, %                          | 42.6              | 18.3              |

**Table 2:** Comparison of missing data, ceiling effects, and internal consistency between the two randomized groups.

| Scale and item <sup>a</sup>                                                                          | Group A          |                    |                     |                                         | Group B          |                    |                     |                                         |
|------------------------------------------------------------------------------------------------------|------------------|--------------------|---------------------|-----------------------------------------|------------------|--------------------|---------------------|-----------------------------------------|
|                                                                                                      | Missing data (%) | Not applicable (%) | Ceiling effects (%) | Cronbach's alpha/item-total correlation | Missing data (%) | Not applicable (%) | Ceiling effects (%) | Cronbach's alpha/item-total correlation |
| <i>GP</i>                                                                                            |                  |                    |                     | <b>0.924</b>                            |                  |                    |                     | <b>0.935</b>                            |
| Do you feel that your GP takes you seriously?                                                        | 5.0              | 3.4                | 48.0                | 0.762                                   | 0.0              | 2.9                | 52.2                | 0.813                                   |
| Do you feel that your GP spends enough time with you?                                                | 4.9              | 3.2                | 28.9                | 0.702                                   | 0.0              | 3.2                | 32.7                | 0.745                                   |
| Do you feel that your GP talks to you in a way you understand?                                       | 5.1              | 3.0                | 48.9                | 0.737                                   | 0.3              | 2.3                | 56.0                | 0.735                                   |
| Do you feel that your GP is professionally competent?                                                | 5.2              | 4.0                | 41.8                | 0.752                                   | 0.6              | 2.9                | 43.1                | 0.805                                   |
| Do you feel that your GP shows interest in your situation?                                           | 5.3              | 3.5                | 39.5                | 0.818                                   | 0.6              | 2.3                | 39.9                | 0.853                                   |
| Do you feel that your GP includes you as much as you would like in decisions concerning you?         | 5.7              | 7.7                | 37.2                | 0.769                                   | 0.3              | 6.5                | 41.9                | 0.803                                   |
| Does your GP provide you with sufficient information about your health problems and their treatment? | 5.6              | 7.3                | 32.7                | 0.811                                   | 0.3              | 6.1                | 34.1                | 0.835                                   |
| Does your GP provide you with sufficient information about the use and side effects of medication?   | 5.4              | 16.3               | 21.0                | 0.631                                   | 0.0              | 16.5               | 24.3                | 0.655                                   |
| Does your GP refer you to further examinations or a specialist when you feel you need it?            | 5.1              | 10.6               | 43.2                | 0.646                                   | 0.3              | 10.6               | 49.3                | 0.633                                   |
| <i>Organization and auxiliary staff</i>                                                              |                  |                    |                     | <b>0.868</b>                            |                  |                    |                     | <b>0.851</b>                            |
| Do you feel that your GP's practice is well organized?                                               | 5.2              | 4.1                | 26.6                | 0.681                                   | 1.0              | 1.6                | 25.8                | 0.615                                   |
| Do you feel the other employees are helpful and competent?                                           | 4.9              | 3.6                | 36.1                | 0.813                                   | 0.3              | 2.9                | 31.7                | 0.806                                   |
| Are you treated with courtesy and respect at the reception?                                          | 4.8              | 3.2                | 40.9                | 0.752                                   | 0.3              | 2.6                | 39.5                | 0.750                                   |
| <i>Accessibility</i>                                                                                 |                  |                    |                     | <b>0.774</b>                            |                  |                    |                     | <b>0.688</b>                            |
| Was the waiting time for your last urgent appointment acceptable?                                    | 18.7             | -                  | 36.2                | 0.631                                   | 17.1             | -                  | 33.5                | 0.525                                   |
| Is this waiting time for appointments that are not urgent acceptable?                                | 12.3             | -                  | 18.0                | 0.631                                   | 6.8              | -                  | 11.4                | 0.525                                   |
| <i>Enablement</i>                                                                                    |                  |                    |                     | <b>0.906</b>                            |                  |                    |                     | <b>0.925</b>                            |
| Does contact with your GP make you better able to understand your health problems?                   | 1.6              | 16.6               | 19.5                | 0.803                                   | 1.0              | 15.8               | 26.0                | 0.836                                   |
| Does contact with your GP make you better able to cope with your health problems?                    | 1.6              | 19.7               | 16.3                | 0.852                                   | 0.6              | 20.3               | 21.2                | 0.875                                   |
| Does contact with your GP better help you to stay healthy?                                           | 1.6              | 19.8               | 15.1                | 0.786                                   | 0.3              | 20.6               | 21.6                | 0.833                                   |
| <i>Coordination and cooperation</i>                                                                  |                  |                    |                     | <b>0.875</b>                            |                  |                    |                     | <b>0.876</b>                            |
| Do you feel that your GP is good at coordinating the range of health services available to you?      | 5.9              | 26.9               | 28.1                | 0.779                                   | 0.6              | 30.6               | 34.7                | 0.790                                   |
| Do you feel that your GP cooperates well with other services you need?                               | 5.7              | 29.4               | 29.0                | 0.779                                   | 0.6              | 31.9               | 29.7                | 0.790                                   |

<sup>a</sup>All items were scored on a 5-point response scale ranging from 1 ("not at all") to 5 ("to a very large degree")



**Table 3:** Comparison of respondent characteristics between the two randomized groups.

|                                                              | Group A     | Group B    | p <sup>a</sup> |
|--------------------------------------------------------------|-------------|------------|----------------|
| Gender, female                                               | 55.9 (1135) | 59.7 (185) | 0.216          |
| Age group                                                    |             |            | <0.001         |
| 16–19 years                                                  | 2.4 (49)    | 2.3 (7)    |                |
| 20–29 years                                                  | 7.8 (158)   | 9.4 (29)   |                |
| 30–49 years                                                  | 23.8 (482)  | 37.4 (116) |                |
| 50–66 years                                                  | 34.2 (694)  | 31.6 (98)  |                |
| ≥67 years                                                    | 31.8 (646)  | 19.4 (60)  |                |
| Time on the list of the GP                                   |             |            | 0.526          |
| <1 year                                                      | 9.4 (191)   | 8.4 (26)   |                |
| 1–2 years                                                    | 19.4 (392)  | 21.3 (66)  |                |
| 3–4 years                                                    | 14.5 (293)  | 16.1 (50)  |                |
| 5–10 years                                                   | 20.4 (414)  | 22.3 (69)  |                |
| ≥11 years                                                    | 36.3 (735)  | 31.9 (99)  |                |
| Number of consultations during past 12 months                |             |            | 0.672          |
| 0                                                            | 9.3 (186)   | 10.1 (31)  |                |
| 1                                                            | 15.7 (314)  | 15.3 (47)  |                |
| 2–5                                                          | 55.7 (1114) | 52.1 (160) |                |
| 6–12                                                         | 16.2 (323)  | 19.2 (59)  |                |
| ≥13                                                          | 3.1 (63)    | 3.3 (10)   |                |
| Number of diagnosis codes during past 24 months              | 13.8±13.5   | 12.6±10.7  | 0.083          |
| Number of unique diagnosis codes during past 24 months       | 4.7±3.2     | 4.6±2.8    | 0.510          |
| Time since previous contact                                  |             |            | 0.042          |
| <1 month                                                     | 36.5 (716)  | 42.1 (128) |                |
| 1–3 months                                                   | 32.0 (628)  | 23.7 (72)  |                |
| 4–6 months                                                   | 13.5 (266)  | 15.1 (46)  |                |
| 7–12 months                                                  | 9.7 (191)   | 8.9 (27)   |                |
| >12 months                                                   | 8.3 (163)   | 10.2 (31)  |                |
| Self-perceived physical health                               |             |            | 0.951          |
| Very poor                                                    | 1.3 (27)    | 1.6 (5)    |                |
| Quite poor                                                   | 5.3 (108)   | 5.2 (16)   |                |
| Both poor and good                                           | 23.8 (481)  | 22.4 (69)  |                |
| Quite good                                                   | 48.3 (975)  | 50.3 (155) |                |
| Very good                                                    | 21.2 (429)  | 20.5 (63)  |                |
| Self-perceived mental health                                 |             |            | 0.475          |
| Very poor                                                    | 1.1 (22)    | 1.9 (6)    |                |
| Quite poor                                                   | 3.0 (60)    | 3.9 (12)   |                |
| Both poor and good                                           | 15.5 (313)  | 15.6 (48)  |                |
| Quite good                                                   | 41.7 (842)  | 38.0 (117) |                |
| Very good                                                    | 38.7 (781)  | 40.6 (125) |                |
| Long-standing health problems                                |             |            | 0.625          |
| 0                                                            | 35.7 (708)  | 37.5 (115) |                |
| 1                                                            | 32.9 (653)  | 34.9 (107) |                |
| 2                                                            | 19.3 (383)  | 16.9 (52)  |                |
| ≥3                                                           | 12.1 (241)  | 10.7 (33)  |                |
| Education level                                              |             |            | <0.001         |
| Elementary school                                            | 15.6 (309)  | 7.1 (22)   |                |
| High school                                                  | 37.4 (740)  | 31.4 (97)  |                |
| University, 0–4 years                                        | 25.6 (505)  | 35.3 (109) |                |
| University, >4 years                                         | 21.4 (422)  | 26.2 (81)  |                |
| Geographic origin                                            |             |            | 0.205          |
| Norway                                                       | 88.6 (1756) | 89.9 (276) |                |
| Asia (incl. Turkey), Africa, or Latin America                | 4.8 (95)    | 3.3 (10)   |                |
| Eastern Europe (all countries, independent of EU membership) | 3.5 (70)    | 2.3 (7)    |                |
| Western Europe, North America, or Oceania                    | 3.0 (60)    | 4.6 (14)   |                |

<sup>a</sup> Pearson chi-square tests for categorical variables and independent-samples t-tests for continuous variables. Data are n (%) or mean±SD values.

**Table 4:** Comparison of respondent characteristics between the two randomized groups.

|                                                        | Group A     |                 | <i>p</i> <sup>a</sup> | Group B     |                 | <i>p</i> <sup>a</sup> |
|--------------------------------------------------------|-------------|-----------------|-----------------------|-------------|-----------------|-----------------------|
|                                                        | Respondents | Non-respondents |                       | Respondents | Non-respondents |                       |
| Gender, female                                         | 55.9 (1135) | 46.1 (1259)     | <0.001                | 59.7 (185)  | 49.8 (689)      | 0.002                 |
| Age group                                              |             |                 | <0.001                |             |                 | <0.001                |
| 16–19 years                                            | 2.4 (49)    | 7.3 (200)       |                       | 2.3 (7)     | 6.4 (88)        |                       |
| 20–29 years                                            | 7.8 (158)   | 20.7 (566)      |                       | 9.4 (29)    | 17.6 (243)      |                       |
| 30–49 years                                            | 23.8 (482)  | 39.5 (1080)     |                       | 37.4 (116)  | 38.8 (537)      |                       |
| 50–66 years                                            | 34.2 (694)  | 21.2 (579)      |                       | 31.6 (98)   | 26.0 (360)      |                       |
| ≥67 years                                              | 31.8 (646)  | 11.2 (306)      |                       | 19.4 (60)   | 11.3 (156)      |                       |
| Time on the list of the GP                             |             |                 | <0.001                |             |                 | 0.739                 |
| <1 year                                                | 9.4 (191)   | 10.5 (288)      |                       | 8.4 (26)    | 9.6 (133)       |                       |
| 1–2 years                                              | 19.4 (392)  | 24.3 (664)      |                       | 21.3 (66)   | 23.3 (322)      |                       |
| 3–4 years                                              | 14.5 (293)  | 15.3 (419)      |                       | 16.1 (50)   | 13.7 (189)      |                       |
| 5–10 years                                             | 20.4 (414)  | 20.9 (570)      |                       | 22.3 (69)   | 22.3 (309)      |                       |
| ≥11 years                                              | 36.3 (735)  | 28.9 (790)      |                       | 31.9 (99)   | 31.1 (431)      |                       |
| Number of consultations during past 24 months          | 10.8±11.3   | 7.6±10.7        | <0.001                | 9.6±9.2     | 8.4±11.5        | 0.077                 |
| Number of diagnosis codes during past 24 months        | 13.8±13.5   | 11.3±14.1       | <0.001                | 12.6±10.7   | 12.2±14.9       | 0.611                 |
| Number of unique diagnosis codes during past 24 months | 4.7±3.2     | 4.1±3.1         | <0.001                | 4.6±2.8     | 4.2±3.2         | 0.107                 |

<sup>a</sup> Pearson chi-square tests for categorical variables and independent-samples *t*-tests for continuous variables. Data are *n* (%) or mean±SD values.

**Table 5:** Comparison of patient-reported experiences between the two randomized groups.

| Scale and item <sup>a</sup>                                                                          | Group A          | Group B          | P            |
|------------------------------------------------------------------------------------------------------|------------------|------------------|--------------|
| <i>GP</i>                                                                                            | <b>78.3±16.8</b> | <b>78.8±17.8</b> | <b>0.651</b> |
| Do you feel that your GP takes you seriously?                                                        | 83.1±19.8        | 84.1±20.3        | 0.429        |
| Do you feel that your GP spends enough time with you?                                                | 73.8±22.8        | 73.3±25.8        | 0.707        |
| Do you feel that your GP talks to you in a way you understand?                                       | 84.6±17.7        | 85.8±19.1        | 0.275        |
| Do you feel that your GP is professionally competent?                                                | 82.1±18.0        | 81.8±19.4        | 0.747        |
| Do you feel that your GP shows interest in your situation?                                           | 79.7±20.5        | 78.7±22.2        | 0.435        |
| Do you feel that your GP includes you as much as you would like in decisions concerning you?         | 79.0±20.3        | 80.0±21.3        | 0.452        |
| Does your GP provide you with sufficient information about your health problems and their treatment? | 76.6±21.2        | 76.1±22.2        | 0.708        |
| Does your GP provide you with sufficient information about the use and side effects of medication?   | 65.0±26.9        | 67.1±26.0        | 0.241        |
| Does your GP refer you to further examination or a specialist when you feel you need it?             | 81.4±20.2        | 82.0±22.2        | 0.712        |
| <i>Organization and auxiliary staff</i>                                                              | <b>78.2±17.7</b> | <b>77.1±18.2</b> | <b>0.322</b> |
| Do you feel that your GP's practice is well organized?                                               | 75.2±20.2        | 74.8±20.4        | 0.735        |
| Do you feel the other employees are helpful and competent?                                           | 79.3±19.2        | 76.9±20.8        | 0.046        |
| Are you treated with courtesy and respect at the reception?                                          | 80.9±19.7        | 79.9±20.7        | 0.430        |
| <i>Accessibility</i>                                                                                 | <b>63.6±27.8</b> | <b>61.8±25.5</b> | <b>0.264</b> |
| Was the waiting time for your last urgent appointment acceptable?                                    | 69.5±30.6        | 69.1±30.4        | 0.828        |
| Is this waiting time for appointments that are not urgent acceptable?                                | 58.3±30.0        | 54.8±28.5        | 0.051        |
| <i>Enablement</i>                                                                                    | <b>65.2±22.1</b> | <b>66.0±24.3</b> | <b>0.601</b> |
| Does contact with your GP make you better able to understand your health problems?                   | 68.1±23.0        | 68.7±25.1        | 0.703        |
| Does contact with your GP make you better able to cope with your health problems?                    | 64.9±24.0        | 65.9±25.6        | 0.560        |
| Does contact with your GP better help you to stay healthy?                                           | 62.7±25.0        | 64.5±26.7        | 0.303        |
| <i>Coordination and cooperation</i>                                                                  | <b>74.3±21.0</b> | <b>74.9±21.5</b> | <b>0.644</b> |
| Do you feel that your GP is good at coordinating the range of health services available to you?      | 75.0±21.2        | 77.7±20.5        | 0.079        |
| Do you feel that your GP cooperates well with other services you need?                               | 74.3±22.6        | 73.0±24.5        | 0.434        |

<sup>a</sup>All scales and items are scored from 0 to 100, where 100 is the best possible patient experience. Data are mean±SD values

Figure 1: CONSORT flow diagram

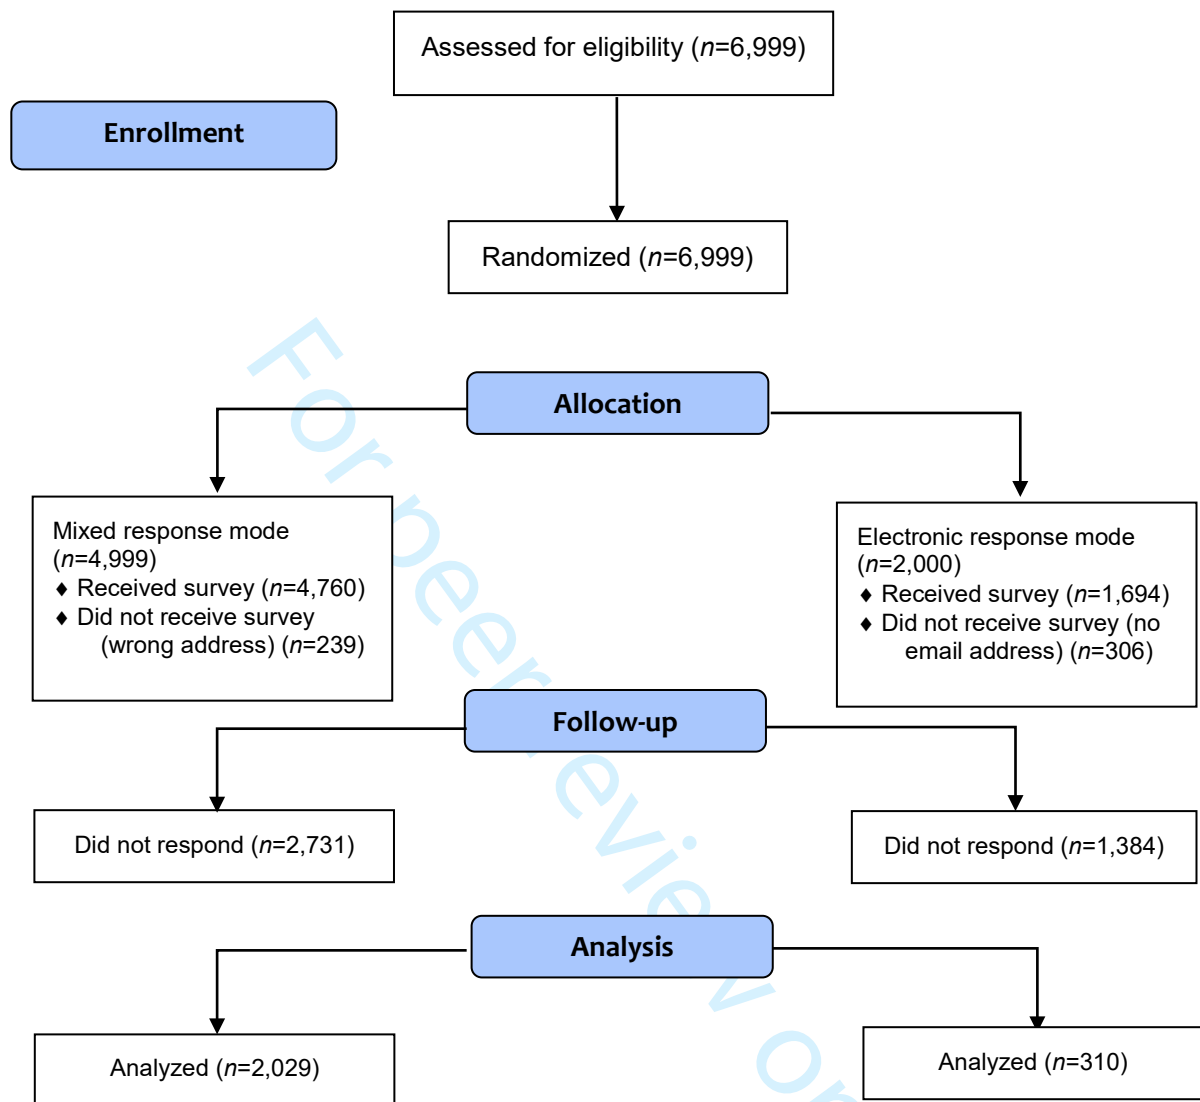

# Reporting checklist for cross sectional study.

Based on the STROBE cross sectional guidelines.

## Instructions to authors

Complete this checklist by entering the page numbers from your manuscript where readers will find each of the items listed below.

Your article may not currently address all the items on the checklist. Please modify your text to include the missing information. If you are certain that an item does not apply, please write "n/a" and provide a short explanation.

Upload your completed checklist as an extra file when you submit to a journal.

In your methods section, say that you used the STROBE cross sectional reporting guidelines, and cite them as:

von Elm E, Altman DG, Egger M, Pocock SJ, Gøtzsche PC, Vandenbroucke JP. The Strengthening the Reporting of Observational Studies in Epidemiology (STROBE) Statement: guidelines for reporting observational studies.

|                           |                     | Reporting Item                                                                                                                  | Page Number |
|---------------------------|---------------------|---------------------------------------------------------------------------------------------------------------------------------|-------------|
| <b>Title and abstract</b> |                     |                                                                                                                                 |             |
| Title                     | <a href="#">#1a</a> | Indicate the study's design with a commonly used term in the title or the abstract                                              | 2           |
| Abstract                  | <a href="#">#1b</a> | Provide in the abstract an informative and balanced summary of what was done and what was found                                 | 2,3         |
| <b>Introduction</b>       |                     |                                                                                                                                 |             |
| Background / rationale    | <a href="#">#2</a>  | Explain the scientific background and rationale for the investigation being reported                                            | 5-6         |
| Objectives                | <a href="#">#3</a>  | State specific objectives, including any prespecified hypotheses                                                                | 2,6         |
| <b>Methods</b>            |                     |                                                                                                                                 |             |
| Study design              | <a href="#">#4</a>  | Present key elements of study design early in the paper                                                                         | 2, 6/7      |
| Setting                   | <a href="#">#5</a>  | Describe the setting, locations, and relevant dates, including periods of recruitment, exposure, follow-up, and data collection | 6-8         |
| Eligibility criteria      | <a href="#">#6a</a> | Give the eligibility criteria, and the sources and methods of selection of participants.                                        | 2, 6-8      |

|    |                     |                      |                                                                                                                                                                                                                                                                                |          |
|----|---------------------|----------------------|--------------------------------------------------------------------------------------------------------------------------------------------------------------------------------------------------------------------------------------------------------------------------------|----------|
| 1  |                     | <a href="#">#7</a>   | Clearly define all outcomes, exposures, predictors, potential confounders, and effect modifiers. Give diagnostic criteria, if applicable                                                                                                                                       | 7,8      |
| 2  |                     |                      |                                                                                                                                                                                                                                                                                |          |
| 3  |                     |                      |                                                                                                                                                                                                                                                                                |          |
| 4  |                     |                      |                                                                                                                                                                                                                                                                                |          |
| 5  | Data sources /      | <a href="#">#8</a>   | For each variable of interest give sources of data and details of methods of assessment (measurement). Describe comparability of assessment methods if there is more than one                                                                                                  | 7,8      |
| 6  | measurement         |                      | group. Give information separately for for exposed and unexposed groups if applicable.                                                                                                                                                                                         |          |
| 7  |                     |                      |                                                                                                                                                                                                                                                                                |          |
| 8  |                     |                      |                                                                                                                                                                                                                                                                                |          |
| 9  |                     |                      |                                                                                                                                                                                                                                                                                |          |
| 10 | Bias                | <a href="#">#9</a>   | Describe any efforts to address potential sources of bias                                                                                                                                                                                                                      | 11-13    |
| 11 |                     |                      |                                                                                                                                                                                                                                                                                |          |
| 12 |                     |                      |                                                                                                                                                                                                                                                                                |          |
| 13 | Study size          | <a href="#">#10</a>  | Explain how the study size was arrived at                                                                                                                                                                                                                                      | 6,7      |
| 14 |                     |                      |                                                                                                                                                                                                                                                                                |          |
| 15 | Quantitative        | <a href="#">#11</a>  | Explain how quantitative variables were handled in the analyses. If applicable, describe                                                                                                                                                                                       | 6-8      |
| 16 | variables           |                      | which groupings were chosen, and why                                                                                                                                                                                                                                           |          |
| 17 |                     |                      |                                                                                                                                                                                                                                                                                |          |
| 18 |                     |                      |                                                                                                                                                                                                                                                                                |          |
| 19 | Statistical methods | <a href="#">#12a</a> | Describe all statistical methods, including those used to control for confounding                                                                                                                                                                                              | 7-8      |
| 20 |                     |                      |                                                                                                                                                                                                                                                                                |          |
| 21 | Statistical methods | <a href="#">#12b</a> | Describe any methods used to examine subgroups and interactions                                                                                                                                                                                                                | 6-8      |
| 22 |                     |                      |                                                                                                                                                                                                                                                                                |          |
| 23 |                     |                      |                                                                                                                                                                                                                                                                                |          |
| 24 | Statistical methods | <a href="#">#12c</a> | Explain how missing data were addressed                                                                                                                                                                                                                                        | 7,8,19   |
| 25 |                     |                      |                                                                                                                                                                                                                                                                                |          |
| 26 | Statistical methods | <a href="#">#12d</a> | If applicable, describe analytical methods taking account of sampling strategy                                                                                                                                                                                                 | 6        |
| 27 |                     |                      |                                                                                                                                                                                                                                                                                |          |
| 28 | Statistical methods | <a href="#">#12e</a> | Describe any sensitivity analyses                                                                                                                                                                                                                                              | n/a      |
| 29 |                     |                      |                                                                                                                                                                                                                                                                                |          |
| 30 |                     |                      |                                                                                                                                                                                                                                                                                |          |
| 31 | <b>Results</b>      |                      |                                                                                                                                                                                                                                                                                |          |
| 32 |                     |                      |                                                                                                                                                                                                                                                                                |          |
| 33 | Participants        | <a href="#">#13a</a> | Report numbers of individuals at each stage of study—eg numbers potentially eligible, examined for eligibility, confirmed eligible, included in the study, completing follow-up, and analysed. Give information separately for for exposed and unexposed groups if applicable. | 6,7,17   |
| 34 |                     |                      |                                                                                                                                                                                                                                                                                |          |
| 35 |                     |                      |                                                                                                                                                                                                                                                                                |          |
| 36 |                     |                      |                                                                                                                                                                                                                                                                                |          |
| 37 |                     |                      |                                                                                                                                                                                                                                                                                |          |
| 38 | Participants        | <a href="#">#13b</a> | Give reasons for non-participation at each stage                                                                                                                                                                                                                               | 17       |
| 39 |                     |                      |                                                                                                                                                                                                                                                                                |          |
| 40 |                     |                      |                                                                                                                                                                                                                                                                                |          |
| 41 | Participants        | <a href="#">#13c</a> | Consider use of a flow diagram                                                                                                                                                                                                                                                 | 17       |
| 42 |                     |                      |                                                                                                                                                                                                                                                                                |          |
| 43 | Descriptive data    | <a href="#">#14a</a> | Give characteristics of study participants (eg demographic, clinical, social) and information on exposures and potential confounders. Give information separately for exposed and unexposed groups if applicable.                                                              | 9,10,20  |
| 44 |                     |                      |                                                                                                                                                                                                                                                                                |          |
| 45 |                     |                      |                                                                                                                                                                                                                                                                                |          |
| 46 |                     |                      |                                                                                                                                                                                                                                                                                |          |
| 47 |                     |                      |                                                                                                                                                                                                                                                                                |          |
| 48 | Descriptive data    | <a href="#">#14b</a> | Indicate number of participants with missing data for each variable of interest                                                                                                                                                                                                | 19       |
| 49 |                     |                      |                                                                                                                                                                                                                                                                                |          |
| 50 |                     |                      |                                                                                                                                                                                                                                                                                |          |
| 51 | Outcome data        | <a href="#">#15</a>  | Report numbers of outcome events or summary measures. Give information separately for exposed and unexposed groups if applicable.                                                                                                                                              | 18,19,21 |
| 52 |                     |                      |                                                                                                                                                                                                                                                                                |          |
| 53 |                     |                      |                                                                                                                                                                                                                                                                                |          |
| 54 |                     |                      |                                                                                                                                                                                                                                                                                |          |
| 55 | Main results        | <a href="#">#16a</a> | Give unadjusted estimates and, if applicable, confounder-adjusted estimates and their precision (eg, 95% confidence interval). Make clear which confounders were adjusted for and why they were included                                                                       | n/a      |
| 56 |                     |                      |                                                                                                                                                                                                                                                                                |          |
| 57 |                     |                      |                                                                                                                                                                                                                                                                                |          |
| 58 |                     |                      |                                                                                                                                                                                                                                                                                |          |
| 59 |                     |                      |                                                                                                                                                                                                                                                                                |          |
| 60 |                     |                      |                                                                                                                                                                                                                                                                                |          |

|    |                    |                      |                                                                                                  |       |
|----|--------------------|----------------------|--------------------------------------------------------------------------------------------------|-------|
| 1  | Main results       | <a href="#">#16b</a> | Report category boundaries when continuous variables were categorized                            | n/a   |
| 2  |                    |                      |                                                                                                  |       |
| 3  | Main results       | <a href="#">#16c</a> | If relevant, consider translating estimates of relative risk into absolute risk for a meaningful | n/a   |
| 4  |                    |                      | time period                                                                                      |       |
| 5  |                    |                      |                                                                                                  |       |
| 6  |                    |                      |                                                                                                  |       |
| 7  | Other analyses     | <a href="#">#17</a>  | Report other analyses done—e.g., analyses of subgroups and interactions, and sensitivity         | n/a   |
| 8  |                    |                      | analyses                                                                                         |       |
| 9  |                    |                      |                                                                                                  |       |
| 10 |                    |                      |                                                                                                  |       |
| 11 | <b>Discussion</b>  |                      |                                                                                                  |       |
| 12 |                    |                      |                                                                                                  |       |
| 13 | Key results        | <a href="#">#18</a>  | Summarise key results with reference to study objectives                                         | 10,11 |
| 14 |                    |                      |                                                                                                  |       |
| 15 | Limitations        | <a href="#">#19</a>  | Discuss limitations of the study, taking into account sources of potential bias or imprecision.  | 12,13 |
| 16 |                    |                      | Discuss both direction and magnitude of any potential bias.                                      |       |
| 17 |                    |                      |                                                                                                  |       |
| 18 |                    |                      |                                                                                                  |       |
| 19 | Interpretation     | <a href="#">#20</a>  | Give a cautious overall interpretation considering objectives, limitations, multiplicity of      | 10-13 |
| 20 |                    |                      | analyses, results from similar studies, and other relevant evidence.                             |       |
| 21 |                    |                      |                                                                                                  |       |
| 22 |                    |                      |                                                                                                  |       |
| 23 | Generalisability   | <a href="#">#21</a>  | Discuss the generalisability (external validity) of the study results                            | 12,13 |
| 24 |                    |                      |                                                                                                  |       |
| 25 |                    |                      |                                                                                                  |       |
| 26 | <b>Other</b>       |                      |                                                                                                  |       |
| 27 | <b>Information</b> |                      |                                                                                                  |       |
| 28 |                    |                      |                                                                                                  |       |
| 29 |                    |                      |                                                                                                  |       |
| 30 | Funding            | <a href="#">#22</a>  | Give the source of funding and the role of the funders for the present study and, if applicable, | 13    |
| 31 |                    |                      | for the original study on which the present article is based                                     |       |
| 32 |                    |                      |                                                                                                  |       |
| 33 |                    |                      |                                                                                                  |       |

The STROBE checklist is distributed under the terms of the Creative Commons Attribution License CC-BY. This checklist was completed on 07. June 2019 using <https://www.goodreports.org/>, a tool made by the [EQUATOR Network](#) in collaboration with [Penelope.ai](#)

# BMJ Open

## Patient-reported experiences with general practitioners: a randomized study of mail and web-based approaches following a national survey

|                                 |                                                                                                                                                                                                                                                               |
|---------------------------------|---------------------------------------------------------------------------------------------------------------------------------------------------------------------------------------------------------------------------------------------------------------|
| Journal:                        | <i>BMJ Open</i>                                                                                                                                                                                                                                               |
| Manuscript ID                   | bmjopen-2019-036533.R2                                                                                                                                                                                                                                        |
| Article Type:                   | Original research                                                                                                                                                                                                                                             |
| Date Submitted by the Author:   | 30-Aug-2020                                                                                                                                                                                                                                                   |
| Complete List of Authors:       | Iversen, Hilde; Norwegian Institute of Public Health, Division of Health Services<br>Holmboe, Olaf; Norwegian Institute of Public Health, Division of Health Services<br>Bjertnaes, Oyvind; Norwegian Institute of Public Health, Division of Health Services |
| <b>Primary Subject Heading</b>: | Research methods                                                                                                                                                                                                                                              |
| Secondary Subject Heading:      | Health services research                                                                                                                                                                                                                                      |
| Keywords:                       | PRIMARY CARE, STATISTICS & RESEARCH METHODS, Quality in health care < HEALTH SERVICES ADMINISTRATION & MANAGEMENT                                                                                                                                             |
|                                 |                                                                                                                                                                                                                                                               |

SCHOLARONE™  
Manuscripts





I, the Submitting Author has the right to grant and does grant on behalf of all authors of the Work (as defined in the below author licence), an exclusive licence and/or a non-exclusive licence for contributions from authors who are: i) UK Crown employees; ii) where BMJ has agreed a CC-BY licence shall apply, and/or iii) in accordance with the terms applicable for US Federal Government officers or employees acting as part of their official duties; on a worldwide, perpetual, irrevocable, royalty-free basis to BMJ Publishing Group Ltd ("BMJ") its licensees and where the relevant Journal is co-owned by BMJ to the co-owners of the Journal, to publish the Work in this journal and any other BMJ products and to exploit all rights, as set out in our [licence](#).

The Submitting Author accepts and understands that any supply made under these terms is made by BMJ to the Submitting Author unless you are acting as an employee on behalf of your employer or a postgraduate student of an affiliated institution which is paying any applicable article publishing charge ("APC") for Open Access articles. Where the Submitting Author wishes to make the Work available on an Open Access basis (and intends to pay the relevant APC), the terms of reuse of such Open Access shall be governed by a Creative Commons licence – details of these licences and which [Creative Commons](#) licence will apply to this Work are set out in our licence referred to above.

Other than as permitted in any relevant BMJ Author's Self Archiving Policies, I confirm this Work has not been accepted for publication elsewhere, is not being considered for publication elsewhere and does not duplicate material already published. I confirm all authors consent to publication of this Work and authorise the granting of this licence.

1  
2  
3  
4 1 **Patient-reported experiences with general practitioners: a**  
5 2 **randomized study of mail and web-based approaches**  
6 3 **following a national survey**  
7  
8  
9  
10  
11  
12  
13

14 8 **Authors:**

15  
16 9 Hilde Hestad Iversen<sup>1</sup> ([hilde.hestad.iversen@fhi.no](mailto:hilde.hestad.iversen@fhi.no)) +47 46400425) (Corresponding author)

17  
18  
19 10 Olaf Holmboe<sup>1</sup> ([olaf.holmboe@fhi.no](mailto:olaf.holmboe@fhi.no))

20  
21 11 Oyvind Bjertnaes<sup>1</sup> ([oyvindandresen.bjertnaes@fhi.no](mailto:oyvindandresen.bjertnaes@fhi.no))  
22  
23  
24  
25  
26  
27  
28  
29

30 13 **Affiliations:**

31 14 <sup>1</sup>Division of Health Services, Norwegian Institute of Public Health, PO Box 222 Skøyen,  
32 15 0213 Oslo, Norway  
33  
34  
35  
36  
37  
38  
39  
40  
41  
42  
43  
44  
45  
46  
47

48 22 **Keywords:** data collection, general practitioners, patient satisfaction, physicians, random  
49 23 allocation, surveys and questionnaires  
50  
51  
52  
53

54 24 **Word count:** 3,917  
55  
56  
57  
58  
59  
60 26

## 1 **Abstract**

### 2 **Objective**

3 The standard data-collection procedure in the Norwegian national patient experience survey  
4 programme is post-discharge mail surveys, which include a pen-and-paper questionnaire with  
5 the option to answer electronically. A purely electronic protocol has not previously been  
6 explored in Norway. The aim of this study was to compare response rates, background  
7 characteristics, data quality and main study results for a survey of patient experiences with  
8 general practitioners (GPs) administered by the standard mail data-collection procedure and a  
9 web-based approach.

### 10 **Design**

11 Cross-sectional survey.

### 12 **Setting**

13 General practitioner offices in Norway.

### 14 **Participants**

15 The sample consisted of 6,999 patients aged 16 years and older registered with a GP in  
16 November 2018.

### 17 **Intervention**

18 Based on a three-stage sampling design, 6,999 patients of GPs aged 16 or older were  
19 randomized to one of two survey administration protocols: Group A, who were mailed an  
20 invitation with both a pen-and-paper including an electronic response option ( $n=4,999$ ) and  
21 Group B, who received an email invitation with electronic response option ( $n=2,000$ ).

### 22 **Main outcome measures**

23 Response rates, background characteristics, data quality and main study results.

## 1       2       3       4       5       6       7       8       9       10       11       12       13       14       15       16       17       18       19       20       21       22       23       24       25       26       27       28       29       30       31       32       33       34       35       36       37       38       39       40       41       42       43       44       45       46       47       48       49       50       51       52       53       54       55       56       57       58       59       60

### 1       **Results**

2       The response rate was markedly higher for the mail survey (42.6%) than for the web-based  
3       survey (18.3%). A few of the background variables differed significantly between the two  
4       groups, but the data quality and patient-reported experiences were similar.

### 5       **Conclusions**

6       Web-based surveys are faster and less expensive than standard mail surveys, but their low  
7       response rates and coverage problems threaten their usefulness and legitimacy. Initiatives to  
8       increase response rates for web-based data collection and strategies for tailoring data  
9       collection to different groups should be key elements in future research.

## 1 Article Summary

### 2 Strengths and Limitations

- 3 • The current study is the first to explore a purely electronic protocol in the national  
4 program of patient experience surveys in Norway
- 5 • No previous surveys in the national program have tested coverage and the quality of  
6 the email addresses in the national register for contact information
- 7 • The study did not use other available digital contact methods than email addresses, and  
8 the generalizability to health systems with different infrastructures and digital  
9 maturities is uncertain
- 10 • The study included adults evaluating their GPs, and the results might not be  
11 generalizable to other patient groups and health-care settings

## 1 Introduction

2 Norway introduced the regular General Practitioner (GP) scheme in 2001. All inhabitants  
3 registered in the National Registry as Norwegian residents have the right to a GP/family  
4 doctor. Migrants eligible to stay in Norway for more than six months are entitled to enrol in  
5 the scheme. GPs in Norway play a key role in the provision of health care, and are often the  
6 first point of contact to acquire health services for most medical problems.<sup>1</sup> In 2018, The  
7 Ministry of Health and Care Services decided to evaluate the GP scheme, and part of this  
8 evaluation comprised a national patient experience survey.

9  
10 The Norwegian Institute of Public Health (NIPH) is responsible for conducting national  
11 patient experience surveys in Norway. Norway has a national program for monitoring and  
12 reporting on the quality of health care using patient experience surveys. The purpose of this  
13 program is to measure user experiences with health care systematically, with the obtained data  
14 used as a basis for interventions aimed at improving the quality of health care, health-care  
15 management, patient choice, and public accountability. The standard data-collection  
16 procedure in the national surveys is post-discharge mail surveys, which include a pen-and-  
17 paper questionnaire and an option to answer electronically.

18  
19 The results from previous studies of survey-mode preferences in different patient populations  
20 both in Norway and other countries indicate that web mode surveys have lower response rates  
21 than other modes.<sup>2-11</sup> In the national patient experience survey among patients visiting general  
22 practitioners in 2014 in Norway, only 18% of respondents answered electronically.<sup>4</sup> However,  
23 the potential advantages of lower costs and shorter data-collection periods are important  
24 arguments for performing further research into web-based surveys. Also, the expansion of

1  
2  
3 1 Internet access and use may have changed the potential of the Internet as an effective way to  
4  
5 2 conduct such surveys.  
6  
7  
8 3

9  
10 4 When comparing the standard mail survey mode of data collection with web-based data  
11  
12 5 collection the characteristics of non-respondents and respondents in both groups should be  
13  
14 6 explored. The literature on the effects of background characteristics on the responses to  
15  
16 7 different data collection methods are inconsistent.<sup>2-10</sup> Non-response bias has been studied in  
17  
18 8 four patient populations in Norway through follow-up telephone interviews with non-  
19  
20 9 respondents,<sup>12-15</sup> including non-respondents in a survey on patient experiences with GPs.<sup>15</sup>  
21  
22 10 The results have shown minor differences between the postal respondents from the national  
23  
24 11 surveys and the postal non-respondents who have provided answers through follow-up  
25  
26 12 interviews. In general, the impact of non-response bias in the large-scale surveys has been  
27  
28 13 considered relatively small.  
29  
30  
31  
32  
33  
34

35 15 The use of Internet in the general population is growing. In 2018, 90% of all Norwegian  
36  
37 16 citizens used the Internet on a daily basis.<sup>16</sup> In all age groups under 60 years, between 90-99  
38  
39 17 percent reported using the Internet daily, but corresponding results for those between 60-69  
40  
41 18 years was 81% and 67% for those aged 70 years or more. Seventeen percent of the citizens  
42  
43 19 aged 70 years or more reported that they never used the Internet. Potential differences in  
44  
45 20 population coverage between paper- and web-based questionnaires and the risk of selection  
46  
47 21 bias from using the Internet for questionnaire surveys has been reduced, but a major concern  
48  
49 22 with protocols that use only digital responses continues to be leaving out people without  
50  
51 23 available digital contact information.  
52  
53  
54  
55  
56  
57  
58  
59  
60

1  
2  
3 1 A purely electronic protocol for patient experience surveys has not previously been explored  
4  
5 2 in the national program for monitoring and reporting on health-care quality in Norway. A  
6  
7 3 main limitation of previous studies has been the lack of e-mail addresses in the sample frame,  
8  
9 4 with the implication that even the electronic group had to be invited by a postal invitation,  
10  
11 5 adding to costs, and precluding the possibility of testing a comprehensive electronic data  
12  
13 6 collection option. The establishment of a national register with electronic contact information  
14  
15 7 opens new possibilities regarding electronic and web-based surveys. A total of 88% of the  
16  
17 8 population was registered in the national register for contact information in November 2018.<sup>17</sup>  
18  
19 9 So far, this register has not been utilized in our national patient experience surveys.  
20  
21  
22  
23  
24  
25

26 11 The aim of the current study was to compare the standard mail survey mode of data collection  
27  
28 12 with exclusively web-based data collection in Norway. The sample was randomized to one of  
29  
30 13 two survey administration protocols: patients in Group A were mailed an invitation with both  
31  
32 14 pen-and-paper and electronic response options, while those in Group B received an email  
33  
34 15 invitation with an electronic response option only (using email addresses obtained from the  
35  
36 16 national register). The response rates, data quality, background characteristics, and main study  
37  
38 17 results were compared between the two groups.  
39  
40  
41  
42  
43  
44  
45  
46

## 47 20 **Methods**

### 48 49 50 21 **Data**

51  
52 22 The sample consisted of patients aged 16 years and older registered with a GP in November  
53  
54 23 2018. The preconditions for the sampling frame were to report the results on a national level  
55  
56 24 and to be able to estimate intraclass correlation coefficients on the GP practice level. With the  
57  
58 25 patient sample size chosen, we explored how the intraclass correlation coefficient (ICC)



1 varied dependent on the number of GPs at the practice level and found that at least four GPs  
2 were needed per GP practice to reach an acceptable ICC, and that not much was gained by  
3 including more GPs per practice. The sampling plan had a three-stage design. First, regular  
4 GP practices were randomly selected after stratification by the number of GPs per practice  
5 and municipality type. Second, all the GPs were included in the selected practices that had up  
6 to four GPs, while four of them were randomly selected in the practices that had five or more  
7 GPs. Third, we randomly selected 14 adult patients from the list of patients for each GP.

8  
9 This study included a total of 6,999 patients. Patients were randomized to 1 of 2 survey  
10 administration protocols: 4,999 patients to the main sample (Group A) and 2,000 patients to a  
11 subsample (Group B) (Fig. 1). The current study was the first to explore a purely electronic  
12 protocol in the national program of patient experience surveys in Norway. The quality of the  
13 patient contact information collected from the national register was also previously  
14 unexplored. Considering the commission of achieving nationally representative results and  
15 the uncertainty regarding the responses from a purely electronic protocol, we evaluated the  
16 risk of randomizing the total sample in two groups as too high and chose to include fewer  
17 patients in the subsample.

18  
19 Patients in Group A were mailed an invitation with both pen-and-paper and electronic  
20 response options. The invitation included a cover letter describing the purpose of the study, a  
21 paper questionnaire, a prepaid envelope and information and a login code to be able to  
22 respond electronically. The patients in Group B received an email invitation with an  
23 electronic response option only. The email invitation included information about the purpose  
24 of the study, a link to the online survey and a login code. Two reminders were sent to non-  
25 respondents in both samples using the same contact mode as the first invitation. The first

1 reminder was sent to both groups around three weeks after the first contact. The second  
2 reminder was sent around six weeks after the first contact. All reminders to Group A were  
3 sent by mail and included a new invitation, the paper questionnaire, the postage-paid envelope  
4 and the login code to enable electronic responses. Group B were sent a new email invitation  
5 with a link to the survey and a login code in both reminders.

6  
7 Background data about the patients were obtained from public registries, including gender,  
8 age, the number of years on the patient list of a GP, and the number of consultations during  
9 the past 24 months. Email addresses were collected from the national register for contact  
10 information, which is operated by the Agency for Public Management and eGovernment.

## 11 12 **Measures**

13 The Norwegian PEQ-GP (Patient Experiences with General Practitioner Questionnaire) was  
14 applied. This instrument was developed and validated according to the standard scientific  
15 procedures of the national patient-reported experience program in Norway.<sup>5,10</sup>

16  
17 A national validation study identified five scales that covered important aspects of the GP  
18 service relating to accessibility, evaluations of the GP and auxiliary staff, cooperation  
19 between the GP and other services, and patient enablement. We included 17 additional items  
20 that were relevant for evaluating the GP scheme. The questionnaire used in the randomized  
21 study consisted of 47 questions on 6 pages. Thirty-seven questions addressed experiences  
22 with the GP service, while ten were background questions. Most of the questions related to  
23 the user-reported experiences were answered in a 5-point response format ranging from “not  
24 at all” to “to a very large degree”. Single item and index scores were transformed linearly  
25 from the 1 to 5 scale to a scale of 0–100. An additional page was included to allow the

1  
2  
3 1 respondents to write comments related to experiences with their GPs and suggestions for  
4  
5 2 future changes to the GP scheme.  
6  
7  
8 3  
9  
10

#### 11 4 **Patient and Public Involvement**

12  
13 5 Patients were included in the development process of the instrument, securing the inclusion of  
14  
15 6 the most important topics for patients. To identify important topics, we assessed reviews of  
16  
17 7 the literature and consulted a reference group comprising GPs, researchers and representatives  
18  
19 8 from health authorities and patient organisations throughout the process of questionnaire  
20  
21 9 development. Cognitive interviews with patients were used to test the questionnaire. First,  
22  
23 10 eight face-to-face interviews and nine telephone interviews were conducted. After an  
24  
25 11 extensive revision, we conducted another 11 face-to-face interviews with patients. The revised  
26  
27 12 version was tested in a pilot study.  
28  
29  
30  
31  
32  
33  
34

#### 35 14 **Statistical analysis**

36  
37 15 The survey response rate by group was calculated as the proportion of eligible patients (i.e.  
38  
39 16 those who had not changed address, died, or were otherwise ineligible) who returned a  
40  
41 17 completed survey (AAPOR response rate 4.0).<sup>18</sup>  
42  
43  
44 18

45  
46 19 Items were assessed for levels of missing data, ceiling effects, and internal consistency. The  
47  
48 20 internal consistency reliability of the five scales was assessed using the item-total correlation  
49  
50 21 and Cronbach's alpha. The item-total correlation coefficient quantifies the strength of an  
51  
52 22 association between an item and the remainder of its indicator, with a coefficient of 0.4  
53  
54 23 considered acceptable.<sup>19</sup> Cronbach's alpha assesses the overall correlation between items  
55  
56 24 within an indicator, and an alpha value of 0.7 is considered satisfactory.<sup>19,20</sup> We set the cut-off  
57  
58  
59  
60

1 criterion for ceiling effects to 50%; that is, an item was considered acceptable if fewer than  
2 50% of the respondents chose the most-favourable response option.<sup>21,22</sup>

3  
4 Differences in respondent characteristics between Group A and Group B were tested using  
5 Pearson chi-square tests for categorical variables and independent-samples *t*-tests for  
6 continuous variables. Differences between the two groups regarding patient-reported  
7 experiences were tested using *t*-tests.

8  
9 Differences in respondent characteristics between respondents and non-respondents in Group  
10 A and respondents and non-respondents in Group B were tested using Pearson chi-square  
11 tests for categorical variables and independent-samples *t*-tests for continuous variables.  
12 Variables available on non-respondents were gender, age, time on the list of the GP, number  
13 of consultations during the past 24 months and number of diagnosis during the past 24  
14 months.

15  
16 All the statistical analyses were performed using SPSS (version 25.0).

### 17 18 **Approval**

19 The Data Protection Officer at the NIPH recommended that the study be approved, and it was  
20 formally approved by the research director of the division for health services at the NIPH. The  
21 Norwegian Directorate of Health approved the use of data from non-respondents in the  
22 nonresponse analysis, except those of patients who withdrew themselves from the study.

23 Return of the questionnaire represented patient consent in the study, which is the standard  
24 procedure in all patient experience surveys conducted by the Norwegian Institute of Public  
25 Health.

## Results

The overall response rate was 42.6% in Group A and 18.3% in Group B (Table 1). 15% of the patients in the electronic arm lacked a valid email address in the national register, and 5% of the patients in the standard mail survey mode lacked a valid mailing address (Fig. 1). Most of the respondents (70.9%) in Group A answered on paper (Table 1). The initial response rate was around 10% lower for Group B than for group A, with the remaining difference being related to reduced effects of both the first and second reminders.

The levels of missing data, proportion of responses in the “not applicable” option, ceiling effects, and internal consistency for the items are presented in Table 2. The levels of missing data ranged from 1.6% to 18.7% in Group A, and from 0.0% to 17.1% in Group B. The proportions of responses in the “not applicable” category ranged from 3.0% to 29.4% in Group A, and from 1.6% to 31.9% in Group B, and were higher in Group A than in Group B for all items except for two on the enablement scale and the items on the coordination and cooperation scale. All scales and items were below the ceiling-effect criterion of 50% in Group A, but two items exceed the criterion in Group B: one about whether the GP takes the patient seriously (52.2%) and the other about whether the GP communicates in a way that the patient can understand (56.0%). Cronbach’s alpha values were similar in the two groups for four of the five indicators, but was lower (and below the criterion of 0.7) for the accessibility indicator in Group B. The remaining Cronbach’s alpha values were above 0.7.

Table 3 compares the background characteristics of the respondents in the two survey administration protocols. Respondent age, time since previous contact, and education level

1 differed significantly between the two groups, yet there were no significant differences in  
2 gender, number of years on the list of the GP, number of consultations, number of diagnosis  
3 codes during the past 24 months, number of unique diagnosis codes the past 24 months, self-  
4 perceived physical health, self-perceived mental health, long-standing health problems, or  
5 geographic origin. The proportion of patients aged 30–49 years was higher in Group B than in  
6 Group A (37.4% compared to 23.8%). In Group A, 31.8% of the patients were aged  $\geq 67$   
7 years, a much higher proportion than in Group B where the corresponding proportion was  
8 19.4%. The respondents in Group B were more likely to report that they had been in contact  
9 with their GP during the previous month than respondents in Group A. There was a  
10 significant tendency for those who responded to the email invitation to have a higher  
11 education level than those who responded to the mailed invitation: 61.5% of those in Group B  
12 reported being educated to the university level, compared to 47.0% in Group A.

13  
14 Significant differences were found between Group A and Group B within respondents and  
15 non-respondents with respect to gender and age (Table 4). In both groups, non-respondents  
16 tended to be more likely to be men and to be younger than respondents. Significant  
17 differences were also found for time on the list of the GP, number of consultations during the  
18 past 24 months and the two variables about number of diagnosis the last two years for Group  
19 A. Respondents tended to have been longer on the GPs list, and to have a higher number of  
20 consultations and diagnosis during the last two years. We found no additional differences  
21 between respondents and non-respondents in Group B.

22  
23 Differences in patient-reported experiences between the two groups were small, varying from  
24 only 0.3 (GP is competent) to 3.5 (waiting time for appointments that are not urgent is  
25 acceptable) on a scale from 0 to 100 (Table 5). There were no significant differences in the 5

1 indicators between the 2 groups, and only 1 of the 24 items was significantly different: the  
2 score for the item about the helpfulness and competence of other employees at GP practices  
3 was significantly higher in Group A than in Group B ( $p=0.046$ ).

## 4 5 **Discussion**

6 This study compared response rates, background characteristics, data quality, and main study  
7 results between two randomized data-collection groups in a national survey of patient  
8 experiences with GPs. Patients in Group A were mailed an invitation with both pen-and-paper  
9 and electronic response options, while those in Group B received an email invitation with an  
10 electronic response option only. The response rate was 2.3-fold higher for the mail protocol  
11 than for the web-based protocol, but the patient-reported experiences were similar in the two  
12 groups.

13  
14 The current study of patient experiences with GPs is the first to explore a purely electronic  
15 protocol in the national program for monitoring and reporting on health-care quality using  
16 patient experience surveys in Norway. Web-based surveys have many advantages, including  
17 direct links to survey sites, ease of distribution, ease of receiving responses, and lower costs,  
18 but a major concern is that they exclude those without an email address or with poor access to  
19 the Internet. The existence of a national register in Norway with electronic contact  
20 information presents a major opportunity for large-scale surveys of patient experiences. The  
21 vast majority of the Norwegian population is included in the national register and use the  
22 Internet on a daily basis, reducing potential variations in the population coverage between  
23 paper- and web-based questionnaires and the risk of selection bias from using the Internet for  
24 questionnaire surveys. However, as many as 15% of the patients in the electronic arm lacked

1 a valid email address in the national registry, the corresponding number we could not reach in  
2 the standard mail data-collection was 5%. Furthermore, only 18% of the contacted sample in  
3 the web-based approach responded.

4  
5 The results are consistent with a number of previous studies reporting that mail surveys  
6 achieve higher response rates than electronic and web-based approaches.<sup>2-11</sup> A recent  
7 Consumer Assessment of Healthcare Providers and Systems (CAHPS) survey produced  
8 similar results when comparing protocols based on web responses via an email invitation and  
9 mail.<sup>7</sup> The mail protocol yielded more than twice the response rate of the web approach. A  
10 study of patient experiences with individual physicians showed that response rates were  
11 higher using mail (51%) than web (15%).<sup>9</sup> In a study of patient experiences with outpatient  
12 clinics 14% responded to the web-based survey and 33% responded to the mail survey.<sup>8</sup> When  
13 considering the completeness of the responses, we found that the web-based questionnaire  
14 had fewer missing values than the mail protocol, which is in line with previous studies. The  
15 levels of ceiling effects and internal consistency were similar in the two groups.

16  
17 Despite the marked differences in response rates, the results showed minor differences in the  
18 level of patient reported experiences between the standard mail data-collection procedure and  
19 a web-based approach. There were no significant differences in the 5 indicators between the 2  
20 groups, and only one single item score was significantly different between the two groups.

21 These results are in line with other findings, that have shown only marginal differences in  
22 patient experiences and satisfaction between patients in web-based and other modes.<sup>2,3,7,8,9</sup>

23 There might be several reasons for the high correlation between the response modes. The  
24 surveys were designed to be as similar as possible, including the invitation letter, the content,  
25 layout and structure of the questionnaire and the timing of the first contact and reminders. The



1  
2  
3 1 invitations to the patients in Group A and Group B were sent the same week and non-  
4  
5 2 respondents in both groups received two reminders.  
6  
7  
8 3  
9

10 4 The response rate alone is a poor predictor of nonresponse bias, and previous studies have  
11  
12 5 failed to find a consistent association between response rates and sample  
13  
14 6 representativeness.<sup>23,24</sup> However, low response rates threaten the legitimacy of surveys in both  
15  
16 7 the clinical and public domains, and reduce the ability of surveys to identify important  
17  
18 8 differences in patient-reported experiences between providers and over time.<sup>2,3</sup> Future  
19  
20 9 research needs to focus on effective initiatives for increasing response rates in web-based  
21  
22 10 protocols, including sending multiple reminders using a combination of emails, messages on  
23  
24 11 mobile phones, and other available platforms. For example, the national infrastructure in  
25  
26 12 Norway provides the possibility for secure digital mailboxes for all Norwegian inhabitants,  
27  
28 13 which could be utilized for contacting digitally active patients.  
29  
30  
31  
32  
33  
34

35 15 The current study showed that a lower education level and higher age were associated with a  
36  
37 16 mail preference. In the current study, we found that respondents invited by email were  
38  
39 17 younger, more educated, and more likely to have had more-recent contact with their GP. We  
40  
41 18 found no significant intergroup differences in the remaining nine background variables. There  
42  
43 19 are several methods for assessing non-response bias, including comparison of respondents and  
44  
45 20 non-respondents on background variables.<sup>25</sup> When we compared respondents with non-  
46  
47 21 respondents, we found that men and younger patients were underrepresented as respondents  
48  
49 22 in both groups. These differences are normally handled by non-response weighting, but such  
50  
51 23 weights are only able to compensate for variables available in the sampling frame. We did not  
52  
53 24 conduct further analysis of non-respondents, but previous follow-up studies of non-  
54  
55 25 respondents in Norway indicate small additional bias.<sup>12-15</sup> However, none of these have  
56  
57  
58  
59  
60

1 included a purely digital protocol, which warrant future non-response research for digital  
2 protocols. The coverage challenges for the digital sampling frame should be part of this  
3 research, as 12% of the population was not registered in the register, and 15% of the  
4 registered persons lacked a valid email address. This coverage challenge is an additional  
5 weakness of purely digital approaches and should be compensated with other response  
6 options for those excluded.

7  
8 The effects of background characteristics reported in the literature are inconsistent.<sup>2-10</sup> The  
9 results from two previous randomized studies showed similar background characteristics for  
10 respondents in different randomized groups.<sup>2,3</sup> However, the respondents in those surveys  
11 were all contacted by mail. Future research should assess how the national infrastructure in  
12 Norway could be used to tailor the mode of data collection to different groups, such as by  
13 providing a range of data-collection modes from purely electronic strategies (for respondents  
14 with high education levels) to a mail-based mixed mode (to older respondents and those with  
15 low education levels).

16  
17 Combined with the low response rates achieved for web-based protocols in this and other  
18 studies, future representative and high-quality surveys should include the opportunity to  
19 answer on pen-and-paper questionnaires. This could be implemented in a mixed-mode design  
20 that provides respondents with the option to choose how they want to respond, making it  
21 possible for patients without Internet access or enough computer skills to also participate.

22  
23 A limitation of this study is that it only included adults evaluating their GPs in Norway, and  
24 so the results might not be generalizable to other health-care settings and countries. In  
25 particular, the national infrastructure and the digital maturity of the population in Norway

1 might differ from the characteristics of other countries. However, the results should be  
2 applicable to health systems with similar infrastructures and digital maturities, and to  
3 countries working to establish regional or national digital infrastructures. The survey was not  
4 linked to a specific contact with the GP or GP office, or actual use e.g. the last six months,  
5 which might have resulted in lower response rates and implies that we were unable to make  
6 any assumptions about specific contacts. Differences in respondent characteristics between  
7 respondents and non-respondents in both groups were tested, but not differences in patient  
8 reported experiences since we lacked a follow-up study of non-respondents. However, the  
9 impact of non-response bias in previous large-scale surveys have been relatively small.<sup>12-15</sup>

## 11 Conclusions

12 Administering a survey of patient experiences with GPs using a web-based protocol produced  
13 results that were very similar to those obtained using the standard mail-mode data-collection  
14 procedure used in the national surveys but had a much lower response rate. Furthermore,  
15 respondents in the digital group were younger, more educated, and had more-recent  
16 experiences with their GPs. Men and younger patients were underrepresented as respondents  
17 in both groups. Web-based surveys are faster and cheaper than standard mail surveys, but  
18 their low response rates threaten their legitimacy. Initiatives to increase response rates for  
19 web-based data collection and strategies for tailoring data collection to different groups  
20 should be key elements in future research.

## 22 Funding

23 This research received grant from the Norwegian Ministry of Health and Care Services  
24 (17/4584-12).

## Competing interests

On behalf of all authors, the corresponding author states that there are no competing interests.

## Author contributions

The Ministry of Health and Care Services initiated the study. H.H.I. planned the study in consultation with O.B. and O.H. H.H.I. performed the statistical analyses with O.B. and O.H. and drafted the manuscript. O.B. and O.H. participated in the planning process, critically revised the manuscript draft and approved the final version of the manuscript. H.H.I. was the project manager for the survey. All authors read and approved the final manuscript.

## Acknowledgements

We thank Inger Opedal Paulsrud from the NIPH for her help in conducting the survey, including performing administrative and technical tasks for the data collection. We would also like to thank Sylvia Drange Sletten, Marius Troøyen and Sindre Møgster Braaten from the NIPH for help developing the system for web-based data collection.

## Availability of data and material

The data set generated and/or analysed during this study is not publicly available due to the need to protect personal data.

## References

1. Eide TB, Straand J, Rosvold EO. Patients' and GPs' expectations regarding healthcare-seeking behaviour: a Norwegian comparative study. *BJGP Open*. 2018;2(4):bjgpopen18X101615.
2. Bjertnaes OA, Iversen HH. User-experience surveys with maternity services: a randomized comparison of two data collection models. *Int J Qual Health Care*. 2012;24(4):433–8.
3. Bjertnaes O, Iversen HH, Skrivarhaug T. A randomized comparison of three data collection models for the measurement of parent experiences with diabetes outpatient care. *BMC Med Res Methodol*. 2018;18 (1):95.
4. Holmboe O, Bjertnæs OA. Patient experiences with Norwegian hospitals in 2015. Results following a national survey. Oslo: Norwegian Knowledge Centre for the Health Services, PasOpp-report 147; 2016. ISSN 1890-1565.
5. Holmboe O, Danielsen K, Iversen HH. Development of a method for the measurement of patient experiences with regular general practitioners. Oslo: Norwegian Knowledge Centre for the Health Services, PasOpp-report 1; 2015. ISSN 1890-1565.
6. Danielsen K, Holmboe O, Hansen SL, Førland O, Bjertnæs OA. Patient experiences with Norwegian primary care out-of-hours clinics. Oslo: Results from a survey among the “Vakttårn” clinics. Norwegian Knowledge Centre for the Health Services, PasOpp-report 1; 2012. ISSN 1890-1565.
7. Fowler FJ Jr, Cosenza C, Cripps LA, Edgman-Levitan S, Cleary PD. The effect of administration mode on CAHPS survey response rates and results: a comparison of mail and web-based approaches. *Health Serv Res*. 2019;54(3):714–21.
8. Bergeson SC, Gray J, Ehrmantraut LA, Laibson T, Hays RD. Comparing web-based with mail survey administration of the Consumer Assessment of Healthcare Providers

- 1  
2  
3 1 and Systems (CAHPS(®)) Clinician and Group survey. *Prim Health Care*.  
4  
5 2 2013;3:1000132.  
6  
7  
8 3 9. Rodriguez HP, von Glahn T, Rogers WH, Chang H, Fanjiang G, Safran DG.  
9  
10 4 Evaluating patients' experiences with individual physicians: a randomized trial of  
11  
12 5 mail, internet, and interactive voice response telephone administration of surveys.  
13  
14 6 *Med Care*. 2006;44(2):167–74.  
15  
16  
17 7 10. Holmboe O, Iversen HH, Danielsen K, Bjertnaes O. The Norwegian patient  
18  
19 8 experiences with GP questionnaire (PEQ-GP): reliability and construct validity  
20  
21 9 following a national survey. *BMJ Open*. 2017;7(9):e016644.  
22  
23  
24 10 11. Iversen HH, Bjertnaes O, Helland Y, Skrivarhaug T. The Adolescent Patient  
25  
26 11 Experiences of Diabetes Care Questionnaire (APEQ-DC): Reliability and Validity in a  
27  
28 12 Study Based on Data from the Norwegian Childhood Diabetes Registry. *Patient Relat*  
29  
30 13 *Outcome Meas*. 2019;10:405-16.  
31  
32  
33 14 12. Guldvog B, Hofoss D, Pettersen KI, Ebbesen J, Ronning OM: PS-RESKVA -  
34  
35 15 pasienttilfredshet i sykehus [PS-RESKVA -patient satisfaction in hospitals]. *Tidsskr*  
36  
37 16 *Nor Laegeforen*. 1998, 118: 386-391.  
38  
39  
40 17 13. Dahle KA, Iversen H, Sjetne IS, Oltedal S: Do non-respondents' characteristics and  
41  
42 18 experiences differ from those of respondents? Poster at the the 25th International  
43  
44 19 Conference by the Society for Quality in Health Care (ISQua). 2008, Copenhagen.  
45  
46  
47 20 14. Iversen H, Dahle KA, Holmboe O: Using telephone interviews to explore potential  
48  
49 21 non-response bias in a national postal survey. Poster at the the 26th International  
50  
51 22 Conference by the Society for Quality in Health Care (ISQua). 2009, Dublin.  
52  
53  
54 23 15. Danielsen K, Iversen H, Holmboe O. Telephone interviews to assess non-response  
55  
56 24 bias in a postal user experience survey: Kirsten Danielsen. *European Journal of Public*  
57  
58 25 *Health*. 2015;25(suppl\_3).  
59  
60

- 1  
2  
3 1 16. Kompetanse Norge. Befolkningens bruk av digitale verktøy. Available from:  
4  
5 2 [https://www.kompetansenorge.no/statistikk-og-analyse/grunnleggende-digital-](https://www.kompetansenorge.no/statistikk-og-analyse/grunnleggende-digital-ferdigheter/befolkningens-bruk-av-digitale-verktoy/#)  
6  
7 [ferdigheter/befolkningens-bruk-av-digitale-verktoy/#](https://www.kompetansenorge.no/statistikk-og-analyse/grunnleggende-digital-ferdigheter/befolkningens-bruk-av-digitale-verktoy/#) [Accessed 10 June 2020].  
8  
9  
10 4 17. Digitaliseringsdirektoratet. Befolkningens bruk av digitale verktøy. Kontakt- og  
11  
12 5 reservasjonsregisteret. Available from: [https://samarbeid.difi.no/statistikk/kontakt-og-](https://samarbeid.difi.no/statistikk/kontakt-og-reservasjonsregisteret)  
13  
14 6 [reservasjonsregisteret](https://samarbeid.difi.no/statistikk/kontakt-og-reservasjonsregisteret) [Accessed 10 June 2020].  
15  
16  
17 7 18. The American Association for Public Opinion Research. 2016. Standard Definitions:  
18  
19 8 Final Dispositions of Case Codes and Outcome Rates for Surveys. 9th edition.  
20  
21 9 AAPOR. [https://www.aapor.org/Standards-Ethics/Standard-Definitions-\(1\).aspx](https://www.aapor.org/Standards-Ethics/Standard-Definitions-(1).aspx).  
22  
23 [Accessed 10 June 2020].  
24  
25  
26 11 19. Nunnally JC, Bernstein IH. Psychometric Theory. 3rd edn. New York: McGraw-Hill;  
27  
28 12 1994.  
29  
30  
31 13 20. Kline RB. Principles and Practice of Structural Equation Modeling. New York:  
32  
33 14 Guildford; 2005.  
34  
35  
36 15 21. Bjertnaes OA, Lyngstad I, Malterud K, Garratt A. The Norwegian EUROPEP  
37  
38 16 questionnaire for patient evaluation of general practice: data quality, reliability and  
39  
40 17 construct validity. *Fam Pract*. 2011;28(3):342–9.  
41  
42  
43 18 22. Ruiz MA, Pardo A, Rejas J, Soto J, Villasante F, Aranguren JL. Development and  
44  
45 19 validation of the “Treatment Satisfaction with Medicines Questionnaire” (SATMED-  
46  
47 20 Q). *Value Health*. 2008;11(5):913–26.  
48  
49  
50 21 23. Groves RM, Peytcheva E. The impact of nonresponse rates on nonresponse bias: a  
51  
52 22 meta-analysis. *Public Opin Q*. 2008;72(2):167–89.  
53  
54  
55 23 24. Groves RM. Nonresponse rates and nonresponse bias in household surveys. *Public*  
56  
57 24 *Opin Q*. 2006;70(5):646–75.  
58  
59  
60

- 1  
2  
3 1 25. Halbesleben JRB, Whitman MV. Evaluating Survey Quality in Health Services  
4  
5 2 Research: A Decision Framework for Assessing Nonresponse Bias. Health Services  
6  
7 3 Research. 2013;48(3):913-30.  
8  
9  
10  
11  
12  
13  
14  
15  
16  
17  
18  
19  
20  
21  
22  
23  
24  
25  
26  
27  
28  
29  
30  
31  
32  
33  
34  
35  
36  
37  
38  
39  
40  
41  
42  
43  
44  
45  
46  
47  
48  
49  
50  
51  
52  
53  
54  
55  
56  
57  
58  
59  
60

For peer review only



1  
2  
3  
4  
5  
6  
7  
8  
9  
10  
11  
12  
13  
14  
15  
16  
17  
18  
19  
20  
21  
22  
23  
24  
25  
26  
27  
28  
29  
30  
31  
32  
33  
34  
35  
36  
37  
38  
39  
40  
41  
42  
43  
44  
45  
46  
47  
48  
49  
50  
51  
52  
53  
54  
55  
56  
57  
58  
59  
60

1 **Figure 1:** CONSORT flow diagram

For peer review only

1 **Table 1:** Respondents before and after each reminder in the two randomized groups, and final response rates.

|                                           | Group A (n=4,760) | Group B (n=1,694) |
|-------------------------------------------|-------------------|-------------------|
| <i>Respondents before reminder:</i>       |                   |                   |
| Electronic, n                             | 272               | 117               |
| Paper, n                                  | 560               | -                 |
| Response rate, %                          | 17.5              | 6.9               |
| <i>Respondents after first reminder:</i>  |                   |                   |
| Electronic, n                             | 171               | 126               |
| Paper, n                                  | 533               | -                 |
| Increase in response rate, %              | 14.8              | 7.4               |
| <i>Respondents after second reminder:</i> |                   |                   |
| Electronic, n                             | 148               | 67                |
| Paper, n                                  | 345               | -                 |
| Increase in response rate, %              | 10.4              | 4.0               |
| <i>Total:</i>                             |                   |                   |
| Electronic, n (%)                         | 591 (29.1)        | 310               |
| Paper, n (%)                              | 1438 (70.9)       |                   |
| Response rate, %                          | 42.6              | 18.3              |

**Table 2:** Comparison of missing data, ceiling effects, and internal consistency between the two randomized groups.

| Scale and item <sup>a</sup>                                                                          | Group A          |                    |                     |                                         | Group B          |                    |                     |                                         |
|------------------------------------------------------------------------------------------------------|------------------|--------------------|---------------------|-----------------------------------------|------------------|--------------------|---------------------|-----------------------------------------|
|                                                                                                      | Missing data (%) | Not applicable (%) | Ceiling effects (%) | Cronbach's alpha/item-total correlation | Missing data (%) | Not applicable (%) | Ceiling effects (%) | Cronbach's alpha/item-total correlation |
| <i>GP</i>                                                                                            |                  |                    |                     | <b>0.924</b>                            |                  |                    |                     | <b>0.935</b>                            |
| Do you feel that your GP takes you seriously?                                                        | 5.0              | 3.4                | 48.0                | 0.762                                   | 0.0              | 2.9                | 52.2                | 0.813                                   |
| Do you feel that your GP spends enough time with you?                                                | 4.9              | 3.2                | 28.9                | 0.702                                   | 0.0              | 3.2                | 32.7                | 0.745                                   |
| Do you feel that your GP talks to you in a way you understand?                                       | 5.1              | 3.0                | 48.9                | 0.737                                   | 0.3              | 2.3                | 56.0                | 0.735                                   |
| Do you feel that your GP is professionally competent?                                                | 5.2              | 4.0                | 41.8                | 0.752                                   | 0.6              | 2.9                | 43.1                | 0.805                                   |
| Do you feel that your GP shows interest in your situation?                                           | 5.3              | 3.5                | 39.5                | 0.818                                   | 0.6              | 2.3                | 39.9                | 0.853                                   |
| Do you feel that your GP includes you as much as you would like in decisions concerning you?         | 5.7              | 7.7                | 37.2                | 0.769                                   | 0.3              | 6.5                | 41.9                | 0.803                                   |
| Does your GP provide you with sufficient information about your health problems and their treatment? | 5.6              | 7.3                | 32.7                | 0.811                                   | 0.3              | 6.1                | 34.1                | 0.835                                   |
| Does your GP provide you with sufficient information about the use and side effects of medication?   | 5.4              | 16.3               | 21.0                | 0.631                                   | 0.0              | 16.5               | 24.3                | 0.655                                   |
| Does your GP refer you to further examinations or a specialist when you feel you need it?            | 5.1              | 10.6               | 43.2                | 0.646                                   | 0.3              | 10.6               | 49.3                | 0.633                                   |
| <i>Organization and auxiliary staff</i>                                                              |                  |                    |                     | <b>0.868</b>                            |                  |                    |                     | <b>0.851</b>                            |
| Do you feel that your GP's practice is well organized?                                               | 5.2              | 4.1                | 26.6                | 0.681                                   | 1.0              | 1.6                | 25.8                | 0.615                                   |
| Do you feel the other employees are helpful and competent?                                           | 4.9              | 3.6                | 36.1                | 0.813                                   | 0.3              | 2.9                | 31.7                | 0.806                                   |
| Are you treated with courtesy and respect at the reception?                                          | 4.8              | 3.2                | 40.9                | 0.752                                   | 0.3              | 2.6                | 39.5                | 0.750                                   |
| <i>Accessibility</i>                                                                                 |                  |                    |                     | <b>0.774</b>                            |                  |                    |                     | <b>0.688</b>                            |
| Was the waiting time for your last urgent appointment acceptable?                                    | 18.7             | -                  | 36.2                | 0.631                                   | 17.1             | -                  | 33.5                | 0.525                                   |
| Is this waiting time for appointments that are not urgent acceptable?                                | 12.3             | -                  | 18.0                | 0.631                                   | 6.8              | -                  | 11.4                | 0.525                                   |
| <i>Enablement</i>                                                                                    |                  |                    |                     | <b>0.906</b>                            |                  |                    |                     | <b>0.925</b>                            |
| Does contact with your GP make you better able to understand your health problems?                   | 1.6              | 16.6               | 19.5                | 0.803                                   | 1.0              | 15.8               | 26.0                | 0.836                                   |
| Does contact with your GP make you better able to cope with your health problems?                    | 1.6              | 19.7               | 16.3                | 0.852                                   | 0.6              | 20.3               | 21.2                | 0.875                                   |
| Does contact with your GP better help you to stay healthy?                                           | 1.6              | 19.8               | 15.1                | 0.786                                   | 0.3              | 20.6               | 21.6                | 0.833                                   |
| <i>Coordination and cooperation</i>                                                                  |                  |                    |                     | <b>0.875</b>                            |                  |                    |                     | <b>0.876</b>                            |
| Do you feel that your GP is good at coordinating the range of health services available to you?      | 5.9              | 26.9               | 28.1                | 0.779                                   | 0.6              | 30.6               | 34.7                | 0.790                                   |
| Do you feel that your GP cooperates well with other services you need?                               | 5.7              | 29.4               | 29.0                | 0.779                                   | 0.6              | 31.9               | 29.7                | 0.790                                   |

<sup>a</sup>All items were scored on a 5-point response scale ranging from 1 ("not at all") to 5 ("to a very large degree")

**Table 3:** Comparison of respondent characteristics between the two randomized groups.

|                                                              | Group A     | Group B    | p <sup>a</sup> |
|--------------------------------------------------------------|-------------|------------|----------------|
| Gender, female                                               | 55.9 (1135) | 59.7 (185) | 0.216          |
| Age group                                                    |             |            | <0.001         |
| 16–19 years                                                  | 2.4 (49)    | 2.3 (7)    |                |
| 20–29 years                                                  | 7.8 (158)   | 9.4 (29)   |                |
| 30–49 years                                                  | 23.8 (482)  | 37.4 (116) |                |
| 50–66 years                                                  | 34.2 (694)  | 31.6 (98)  |                |
| ≥67 years                                                    | 31.8 (646)  | 19.4 (60)  |                |
| Time on the list of the GP                                   |             |            | 0.526          |
| <1 year                                                      | 9.4 (191)   | 8.4 (26)   |                |
| 1–2 years                                                    | 19.4 (392)  | 21.3 (66)  |                |
| 3–4 years                                                    | 14.5 (293)  | 16.1 (50)  |                |
| 5–10 years                                                   | 20.4 (414)  | 22.3 (69)  |                |
| ≥11 years                                                    | 36.3 (735)  | 31.9 (99)  |                |
| Number of consultations during past 12 months                |             |            | 0.672          |
| 0                                                            | 9.3 (186)   | 10.1 (31)  |                |
| 1                                                            | 15.7 (314)  | 15.3 (47)  |                |
| 2–5                                                          | 55.7 (1114) | 52.1 (160) |                |
| 6–12                                                         | 16.2 (323)  | 19.2 (59)  |                |
| ≥13                                                          | 3.1 (63)    | 3.3 (10)   |                |
| Number of diagnosis codes during past 24 months              | 13.8±13.5   | 12.6±10.7  | 0.083          |
| Number of unique diagnosis codes during past 24 months       | 4.7±3.2     | 4.6±2.8    | 0.510          |
| Time since previous contact                                  |             |            | 0.042          |
| <1 month                                                     | 36.5 (716)  | 42.1 (128) |                |
| 1–3 months                                                   | 32.0 (628)  | 23.7 (72)  |                |
| 4–6 months                                                   | 13.5 (266)  | 15.1 (46)  |                |
| 7–12 months                                                  | 9.7 (191)   | 8.9 (27)   |                |
| >12 months                                                   | 8.3 (163)   | 10.2 (31)  |                |
| Self-perceived physical health                               |             |            | 0.951          |
| Very poor                                                    | 1.3 (27)    | 1.6 (5)    |                |
| Quite poor                                                   | 5.3 (108)   | 5.2 (16)   |                |
| Both poor and good                                           | 23.8 (481)  | 22.4 (69)  |                |
| Quite good                                                   | 48.3 (975)  | 50.3 (155) |                |
| Very good                                                    | 21.2 (429)  | 20.5 (63)  |                |
| Self-perceived mental health                                 |             |            | 0.475          |
| Very poor                                                    | 1.1 (22)    | 1.9 (6)    |                |
| Quite poor                                                   | 3.0 (60)    | 3.9 (12)   |                |
| Both poor and good                                           | 15.5 (313)  | 15.6 (48)  |                |
| Quite good                                                   | 41.7 (842)  | 38.0 (117) |                |
| Very good                                                    | 38.7 (781)  | 40.6 (125) |                |
| Long-standing health problems                                |             |            | 0.625          |
| 0                                                            | 35.7 (708)  | 37.5 (115) |                |
| 1                                                            | 32.9 (653)  | 34.9 (107) |                |
| 2                                                            | 19.3 (383)  | 16.9 (52)  |                |
| ≥3                                                           | 12.1 (241)  | 10.7 (33)  |                |
| Education level                                              |             |            | <0.001         |
| Elementary school                                            | 15.6 (309)  | 7.1 (22)   |                |
| High school                                                  | 37.4 (740)  | 31.4 (97)  |                |
| University, 0–4 years                                        | 25.6 (505)  | 35.3 (109) |                |
| University, >4 years                                         | 21.4 (422)  | 26.2 (81)  |                |
| Geographic origin                                            |             |            | 0.205          |
| Norway                                                       | 88.6 (1756) | 89.9 (276) |                |
| Asia (incl. Turkey), Africa, or Latin America                | 4.8 (95)    | 3.3 (10)   |                |
| Eastern Europe (all countries, independent of EU membership) | 3.5 (70)    | 2.3 (7)    |                |
| Western Europe, North America, or Oceania                    | 3.0 (60)    | 4.6 (14)   |                |

<sup>a</sup> Pearson chi-square tests for categorical variables and independent-samples t-tests for continuous variables. Data are n (%) or mean±SD values.

**Table 4:** Comparison of respondent characteristics between the two randomized groups.

|                                                        | Group A     |                 | <i>p</i> <sup>a</sup> | Group B     |                 | <i>p</i> <sup>a</sup> |
|--------------------------------------------------------|-------------|-----------------|-----------------------|-------------|-----------------|-----------------------|
|                                                        | Respondents | Non-respondents |                       | Respondents | Non-respondents |                       |
| Gender, female                                         | 55.9 (1135) | 46.1 (1259)     | <0.001                | 59.7 (185)  | 49.8 (689)      | 0.002                 |
| Age group                                              |             |                 | <0.001                |             |                 | <0.001                |
| 16–19 years                                            | 2.4 (49)    | 7.3 (200)       |                       | 2.3 (7)     | 6.4 (88)        |                       |
| 20–29 years                                            | 7.8 (158)   | 20.7 (566)      |                       | 9.4 (29)    | 17.6 (243)      |                       |
| 30–49 years                                            | 23.8 (482)  | 39.5 (1080)     |                       | 37.4 (116)  | 38.8 (537)      |                       |
| 50–66 years                                            | 34.2 (694)  | 21.2 (579)      |                       | 31.6 (98)   | 26.0 (360)      |                       |
| ≥67 years                                              | 31.8 (646)  | 11.2 (306)      |                       | 19.4 (60)   | 11.3 (156)      |                       |
| Time on the list of the GP                             |             |                 | <0.001                |             |                 | 0.739                 |
| <1 year                                                | 9.4 (191)   | 10.5 (288)      |                       | 8.4 (26)    | 9.6 (133)       |                       |
| 1–2 years                                              | 19.4 (392)  | 24.3 (664)      |                       | 21.3 (66)   | 23.3 (322)      |                       |
| 3–4 years                                              | 14.5 (293)  | 15.3 (419)      |                       | 16.1 (50)   | 13.7 (189)      |                       |
| 5–10 years                                             | 20.4 (414)  | 20.9 (570)      |                       | 22.3 (69)   | 22.3 (309)      |                       |
| ≥11 years                                              | 36.3 (735)  | 28.9 (790)      |                       | 31.9 (99)   | 31.1 (431)      |                       |
| Number of consultations during past 24 months          | 10.8±11.3   | 7.6±10.7        | <0.001                | 9.6±9.2     | 8.4±11.5        | 0.077                 |
| Number of diagnosis codes during past 24 months        | 13.8±13.5   | 11.3±14.1       | <0.001                | 12.6±10.7   | 12.2±14.9       | 0.611                 |
| Number of unique diagnosis codes during past 24 months | 4.7±3.2     | 4.1±3.1         | <0.001                | 4.6±2.8     | 4.2±3.2         | 0.107                 |

<sup>a</sup> Pearson chi-square tests for categorical variables and independent-samples *t*-tests for continuous variables. Data are *n* (%) or mean±SD values.

**Table 5:** Comparison of patient-reported experiences between the two randomized groups.

| Scale and item <sup>a</sup>                                                                          | Group A          | Group B          | P            |
|------------------------------------------------------------------------------------------------------|------------------|------------------|--------------|
| <i>GP</i>                                                                                            | <b>78.3±16.8</b> | <b>78.8±17.8</b> | <b>0.651</b> |
| Do you feel that your GP takes you seriously?                                                        | 83.1±19.8        | 84.1±20.3        | 0.429        |
| Do you feel that your GP spends enough time with you?                                                | 73.8±22.8        | 73.3±25.8        | 0.707        |
| Do you feel that your GP talks to you in a way you understand?                                       | 84.6±17.7        | 85.8±19.1        | 0.275        |
| Do you feel that your GP is professionally competent?                                                | 82.1±18.0        | 81.8±19.4        | 0.747        |
| Do you feel that your GP shows interest in your situation?                                           | 79.7±20.5        | 78.7±22.2        | 0.435        |
| Do you feel that your GP includes you as much as you would like in decisions concerning you?         | 79.0±20.3        | 80.0±21.3        | 0.452        |
| Does your GP provide you with sufficient information about your health problems and their treatment? | 76.6±21.2        | 76.1±22.2        | 0.708        |
| Does your GP provide you with sufficient information about the use and side effects of medication?   | 65.0±26.9        | 67.1±26.0        | 0.241        |
| Does your GP refer you to further examination or a specialist when you feel you need it?             | 81.4±20.2        | 82.0±22.2        | 0.712        |
| <i>Organization and auxiliary staff</i>                                                              | <b>78.2±17.7</b> | <b>77.1±18.2</b> | <b>0.322</b> |
| Do you feel that your GP's practice is well organized?                                               | 75.2±20.2        | 74.8±20.4        | 0.735        |
| Do you feel the other employees are helpful and competent?                                           | 79.3±19.2        | 76.9±20.8        | 0.046        |
| Are you treated with courtesy and respect at the reception?                                          | 80.9±19.7        | 79.9±20.7        | 0.430        |
| <i>Accessibility</i>                                                                                 | <b>63.6±27.8</b> | <b>61.8±25.5</b> | <b>0.264</b> |
| Was the waiting time for your last urgent appointment acceptable?                                    | 69.5±30.6        | 69.1±30.4        | 0.828        |
| Is this waiting time for appointments that are not urgent acceptable?                                | 58.3±30.0        | 54.8±28.5        | 0.051        |
| <i>Enablement</i>                                                                                    | <b>65.2±22.1</b> | <b>66.0±24.3</b> | <b>0.601</b> |
| Does contact with your GP make you better able to understand your health problems?                   | 68.1±23.0        | 68.7±25.1        | 0.703        |
| Does contact with your GP make you better able to cope with your health problems?                    | 64.9±24.0        | 65.9±25.6        | 0.560        |
| Does contact with your GP better help you to stay healthy?                                           | 62.7±25.0        | 64.5±26.7        | 0.303        |
| <i>Coordination and cooperation</i>                                                                  | <b>74.3±21.0</b> | <b>74.9±21.5</b> | <b>0.644</b> |
| Do you feel that your GP is good at coordinating the range of health services available to you?      | 75.0±21.2        | 77.7±20.5        | 0.079        |
| Do you feel that your GP cooperates well with other services you need?                               | 74.3±22.6        | 73.0±24.5        | 0.434        |

<sup>a</sup>All scales and items are scored from 0 to 100, where 100 is the best possible patient experience. Data are mean±SD values

Figure 1: CONSORT flow diagram



# Reporting checklist for cross sectional study.

Based on the STROBE cross sectional guidelines.

## Instructions to authors

Complete this checklist by entering the page numbers from your manuscript where readers will find each of the items listed below.

Your article may not currently address all the items on the checklist. Please modify your text to include the missing information. If you are certain that an item does not apply, please write "n/a" and provide a short explanation.

Upload your completed checklist as an extra file when you submit to a journal.

In your methods section, say that you used the STROBE cross sectional reporting guidelines, and cite them as:

von Elm E, Altman DG, Egger M, Pocock SJ, Gøtzsche PC, Vandenbroucke JP. The Strengthening the Reporting of Observational Studies in Epidemiology (STROBE) Statement: guidelines for reporting observational studies.

|                           |                     | Reporting Item                                                                                                                  | Page Number |
|---------------------------|---------------------|---------------------------------------------------------------------------------------------------------------------------------|-------------|
| <b>Title and abstract</b> |                     |                                                                                                                                 |             |
| Title                     | <a href="#">#1a</a> | Indicate the study's design with a commonly used term in the title or the abstract                                              | 2           |
| Abstract                  | <a href="#">#1b</a> | Provide in the abstract an informative and balanced summary of what was done and what was found                                 | 2,3         |
| <b>Introduction</b>       |                     |                                                                                                                                 |             |
| Background / rationale    | <a href="#">#2</a>  | Explain the scientific background and rationale for the investigation being reported                                            | 5-6         |
| Objectives                | <a href="#">#3</a>  | State specific objectives, including any prespecified hypotheses                                                                | 2,6         |
| <b>Methods</b>            |                     |                                                                                                                                 |             |
| Study design              | <a href="#">#4</a>  | Present key elements of study design early in the paper                                                                         | 2, 6/7      |
| Setting                   | <a href="#">#5</a>  | Describe the setting, locations, and relevant dates, including periods of recruitment, exposure, follow-up, and data collection | 6-8         |
| Eligibility criteria      | <a href="#">#6a</a> | Give the eligibility criteria, and the sources and methods of selection of participants.                                        | 2, 6-8      |



|    |                     |                      |                                                                                                                                                                              |          |
|----|---------------------|----------------------|------------------------------------------------------------------------------------------------------------------------------------------------------------------------------|----------|
| 1  |                     | <a href="#">#7</a>   | Clearly define all outcomes, exposures, predictors, potential confounders, and effect modifiers. Give diagnostic criteria, if applicable                                     | 7,8      |
| 2  |                     |                      |                                                                                                                                                                              |          |
| 3  |                     |                      |                                                                                                                                                                              |          |
| 4  |                     |                      |                                                                                                                                                                              |          |
| 5  | Data sources /      | <a href="#">#8</a>   | For each variable of interest give sources of data and details of methods of assessment                                                                                      | 7,8      |
| 6  | measurement         |                      | (measurement). Describe comparability of assessment methods if there is more than one group. Give information separately for for exposed and unexposed groups if applicable. |          |
| 7  |                     |                      |                                                                                                                                                                              |          |
| 8  |                     |                      |                                                                                                                                                                              |          |
| 9  |                     |                      |                                                                                                                                                                              |          |
| 10 | Bias                | <a href="#">#9</a>   | Describe any efforts to address potential sources of bias                                                                                                                    | 11-13    |
| 11 |                     |                      |                                                                                                                                                                              |          |
| 12 | Study size          | <a href="#">#10</a>  | Explain how the study size was arrived at                                                                                                                                    | 6,7      |
| 13 |                     |                      |                                                                                                                                                                              |          |
| 14 |                     |                      |                                                                                                                                                                              |          |
| 15 | Quantitative        | <a href="#">#11</a>  | Explain how quantitative variables were handled in the analyses. If applicable, describe                                                                                     | 6-8      |
| 16 | variables           |                      | which groupings were chosen, and why                                                                                                                                         |          |
| 17 |                     |                      |                                                                                                                                                                              |          |
| 18 |                     |                      |                                                                                                                                                                              |          |
| 19 | Statistical methods | <a href="#">#12a</a> | Describe all statistical methods, including those used to control for confounding                                                                                            | 7-8      |
| 20 |                     |                      |                                                                                                                                                                              |          |
| 21 | Statistical methods | <a href="#">#12b</a> | Describe any methods used to examine subgroups and interactions                                                                                                              | 6-8      |
| 22 |                     |                      |                                                                                                                                                                              |          |
| 23 | Statistical methods | <a href="#">#12c</a> | Explain how missing data were addressed                                                                                                                                      | 7,8,19   |
| 24 |                     |                      |                                                                                                                                                                              |          |
| 25 |                     |                      |                                                                                                                                                                              |          |
| 26 | Statistical methods | <a href="#">#12d</a> | If applicable, describe analytical methods taking account of sampling strategy                                                                                               | 6        |
| 27 |                     |                      |                                                                                                                                                                              |          |
| 28 | Statistical methods | <a href="#">#12e</a> | Describe any sensitivity analyses                                                                                                                                            | n/a      |
| 29 |                     |                      |                                                                                                                                                                              |          |
| 30 |                     |                      |                                                                                                                                                                              |          |
| 31 | <b>Results</b>      |                      |                                                                                                                                                                              |          |
| 32 |                     |                      |                                                                                                                                                                              |          |
| 33 | Participants        | <a href="#">#13a</a> | Report numbers of individuals at each stage of study—eg numbers potentially eligible,                                                                                        | 6,7,17   |
| 34 |                     |                      | examined for eligibility, confirmed eligible, included in the study, completing follow-up, and                                                                               |          |
| 35 |                     |                      | analysed. Give information separately for for exposed and unexposed groups if applicable.                                                                                    |          |
| 36 |                     |                      |                                                                                                                                                                              |          |
| 37 |                     |                      |                                                                                                                                                                              |          |
| 38 | Participants        | <a href="#">#13b</a> | Give reasons for non-participation at each stage                                                                                                                             | 17       |
| 39 |                     |                      |                                                                                                                                                                              |          |
| 40 |                     |                      |                                                                                                                                                                              |          |
| 41 | Participants        | <a href="#">#13c</a> | Consider use of a flow diagram                                                                                                                                               | 17       |
| 42 |                     |                      |                                                                                                                                                                              |          |
| 43 | Descriptive data    | <a href="#">#14a</a> | Give characteristics of study participants (eg demographic, clinical, social) and information                                                                                | 9,10,20  |
| 44 |                     |                      | on exposures and potential confounders. Give information separately for exposed and                                                                                          |          |
| 45 |                     |                      | unexposed groups if applicable.                                                                                                                                              |          |
| 46 |                     |                      |                                                                                                                                                                              |          |
| 47 |                     |                      |                                                                                                                                                                              |          |
| 48 | Descriptive data    | <a href="#">#14b</a> | Indicate number of participants with missing data for each variable of interest                                                                                              | 19       |
| 49 |                     |                      |                                                                                                                                                                              |          |
| 50 |                     |                      |                                                                                                                                                                              |          |
| 51 | Outcome data        | <a href="#">#15</a>  | Report numbers of outcome events or summary measures. Give information separately for                                                                                        | 18,19,21 |
| 52 |                     |                      | exposed and unexposed groups if applicable.                                                                                                                                  |          |
| 53 |                     |                      |                                                                                                                                                                              |          |
| 54 |                     |                      |                                                                                                                                                                              |          |
| 55 | Main results        | <a href="#">#16a</a> | Give unadjusted estimates and, if applicable, confounder-adjusted estimates and their                                                                                        | n/a      |
| 56 |                     |                      | precision (eg, 95% confidence interval). Make clear which confounders were adjusted for                                                                                      |          |
| 57 |                     |                      | and why they were included                                                                                                                                                   |          |
| 58 |                     |                      |                                                                                                                                                                              |          |
| 59 |                     |                      |                                                                                                                                                                              |          |
| 60 |                     |                      |                                                                                                                                                                              |          |

|    |                    |                      |                                                                                                  |       |
|----|--------------------|----------------------|--------------------------------------------------------------------------------------------------|-------|
| 1  | Main results       | <a href="#">#16b</a> | Report category boundaries when continuous variables were categorized                            | n/a   |
| 2  |                    |                      |                                                                                                  |       |
| 3  | Main results       | <a href="#">#16c</a> | If relevant, consider translating estimates of relative risk into absolute risk for a meaningful | n/a   |
| 4  |                    |                      | time period                                                                                      |       |
| 5  |                    |                      |                                                                                                  |       |
| 6  |                    |                      |                                                                                                  |       |
| 7  | Other analyses     | <a href="#">#17</a>  | Report other analyses done—e.g., analyses of subgroups and interactions, and sensitivity         | n/a   |
| 8  |                    |                      | analyses                                                                                         |       |
| 9  |                    |                      |                                                                                                  |       |
| 10 |                    |                      |                                                                                                  |       |
| 11 | <b>Discussion</b>  |                      |                                                                                                  |       |
| 12 |                    |                      |                                                                                                  |       |
| 13 | Key results        | <a href="#">#18</a>  | Summarise key results with reference to study objectives                                         | 10,11 |
| 14 |                    |                      |                                                                                                  |       |
| 15 | Limitations        | <a href="#">#19</a>  | Discuss limitations of the study, taking into account sources of potential bias or imprecision.  | 12,13 |
| 16 |                    |                      | Discuss both direction and magnitude of any potential bias.                                      |       |
| 17 |                    |                      |                                                                                                  |       |
| 18 |                    |                      |                                                                                                  |       |
| 19 | Interpretation     | <a href="#">#20</a>  | Give a cautious overall interpretation considering objectives, limitations, multiplicity of      | 10-13 |
| 20 |                    |                      | analyses, results from similar studies, and other relevant evidence.                             |       |
| 21 |                    |                      |                                                                                                  |       |
| 22 |                    |                      |                                                                                                  |       |
| 23 | Generalisability   | <a href="#">#21</a>  | Discuss the generalisability (external validity) of the study results                            | 12,13 |
| 24 |                    |                      |                                                                                                  |       |
| 25 |                    |                      |                                                                                                  |       |
| 26 | <b>Other</b>       |                      |                                                                                                  |       |
| 27 | <b>Information</b> |                      |                                                                                                  |       |
| 28 |                    |                      |                                                                                                  |       |
| 29 |                    |                      |                                                                                                  |       |
| 30 | Funding            | <a href="#">#22</a>  | Give the source of funding and the role of the funders for the present study and, if applicable, | 13    |
| 31 |                    |                      | for the original study on which the present article is based                                     |       |
| 32 |                    |                      |                                                                                                  |       |
| 33 |                    |                      |                                                                                                  |       |

The STROBE checklist is distributed under the terms of the Creative Commons Attribution License CC-BY. This checklist was completed on 07. June 2019 using <https://www.goodreports.org/>, a tool made by the [EQUATOR Network](#) in collaboration with [Penelope.ai](#)
